# Reconstitution of the equilibrium state of dynamic actin networks

Angelika Manhart<sup>1\*†</sup>, Aleksandra Icheva<sup>2†</sup>, Christophe Guerin<sup>2</sup>, Tobias Klar<sup>2</sup>,  
Rajaa Boujemaa-Paterski<sup>2</sup>, Manuel Thery<sup>2,3</sup>, Laurent Blanchoin<sup>2,3\*‡</sup>, Alex  
Mogilner<sup>1\*‡</sup>

**\*For correspondence:**

[angelika.manhart@cims.nyu.edu](mailto:angelika.manhart@cims.nyu.edu);  
[mogilner@cims.nyu.edu](mailto:mogilner@cims.nyu.edu);  
[laurent.blanchoin@cea.fr](mailto:laurent.blanchoin@cea.fr)

<sup>†</sup>These authors contributed equally to this work

<sup>‡</sup>These authors also contributed equally to this work

<sup>1</sup>Courant Institute of Mathematical Sciences, New York University, New York, NY 10012, United States; <sup>2</sup>CytomorphoLab, Biosciences & Biotechnology Institute of Grenoble, Laboratoire de Physiologie Cellulaire & Végétale, Université Grenoble-Alpes/CEA/CNRS/INRA, 38054 Grenoble, France; <sup>3</sup>CytomorphoLab, Hôpital Saint Louis, Institut Universitaire d'Hématologie, UMRS1160, INSERM/AP-HP/Université Paris Diderot, 75010 Paris, France

**Abstract** Principles of regulation of actin network dimensions, fundamentally important for cell functions, remain unclear. We studied *in vitro* and *in silico* the effect of key parameters, actin density, ADF/Cofilin concentration and network width on the network length. In the presence of ADF/Cofilin, networks reached equilibrium and became globally treadmilling. At the trailing edge, the network disintegrated into large fragments. A mathematical model predicts the network length as a function of width, actin and ADF/Cofilin concentrations. Local depletion of ADF/Cofilin by binding to actin is significant, leading to wider networks growing longer. A single rate of breaking network nodes, proportional to ADF/Cofilin density and inversely proportional to the square of the actin density, can account for the disassembly dynamics. Selective disassembly of heterogeneous networks by ADF/Cofilin controls steering during motility. Our results establish general principles on how the dynamic equilibrium state of actin network emerges from biochemical and structural feedbacks.

## Introduction

Dynamic actin networks play important roles in cell migration (*Rottner and Stradal, 2011*), morphogenesis (*Hopmann and Miller, 2003*), immune response (*Vargas et al., 2016*) and intracellular pathogen motility (*Reed et al., 2014*). The architecture and geometry of the actin networks are tightly controlled in these essential cellular processes, and defects in this control cause pathologies, i.e. ageing disorders (*Amberg et al., 2011*). Here, we focus on the equilibrium dynamics of branched filament arrays that are initiated by the Arp2/3 complex (*Rotty et al., 2013*), activated by WASP family proteins (*Krause and Gautreau, 2014*), and instrumental in lamellipodial extension (*Krause and Gautreau, 2014*), pathogen propulsion (*Reed et al., 2014*), endo- and exocytosis (*Li et al., 2018*).

In many cellular processes, the branched actin networks are polarized and appear in a state of dynamic equilibrium: at their leading edge, barbed filament ends are oriented forward and polymerize elongating the network, while throughout the network a net disassembly takes place, gradually thinning the network out and limiting the network to a finite equilibrium length. As a result, the network exist in a "global treadmilling state" (*Borisy and Svitkina, 2000; Carlier and Shekhar, 2017; Koestler et al., 2013*) – as opposed to the well-characterized treadmilling of individ-

42 ual filaments. Important examples of such networks are flat lamellipodia at the leading edge of  
43 cells migrating on flat surfaces (*Rottner and Stradal, 2011; Barnhart et al., 2011; Ofer et al., 2011;*  
44 *Aroush et al., 2017; Rottner and Schaks, 2019*) and in 3D extracellular matrix (*Fritz-Laylin et al.,*  
45 *2017*) and cylindrical actin tails propelling intracellular pathogens (*Theriot et al., 1992; Rosenblatt*  
46 *et al., 1997; Lacayo et al., 2012; Reed et al., 2014*), endosomes and lysosomes (*Taunton et al., 2000*).

47  
48 In what follows, we call the distance from the leading to trailing edge, the network length, and the  
49 characteristic dimension of the leading edge, the network width (*Figure 1–Figure Supplement 1B*).  
50 Both length and width of the dynamic network are important physiological parameters (*Carlier*  
51 *and Shekhar, 2017*) that have to be regulated. For example, the width of the actin tails is usually  
52 approximately equal to the size of the pathogen or organelle, which is being propelled by the tail,  
53 and the length, presumably, has to be sufficient for the tail to be enmeshed with the host cell  
54 cytoskeletal scaffold. The width and length of lamellipodia probably have to be sufficient to fit into  
55 the geometry of the extracellular matrix and to accommodate other cytoskeletal elements, such as  
56 stress fibers.

57  
58 Assembly and disassembly play central roles in determining actin network length (*Theriot et al.,*  
59 *1992; Ofer et al., 2011*), yet while assembly is relatively well studied (*Rottner and Schaks, 2019*),  
60 systems-level understanding of disassembly is lacking. In keratocytes' cytoplasmic fragments, the  
61 lamellipodial length,  $L$ , is simply determined by the time necessary for the disassembly character-  
62 ized by rate  $\delta$  to largely degrade the lamellipodial network assembled at the leading edge, so if the  
63 actin network growth rate is  $V$ , then  $L \sim V/\delta$  (*Ofer et al., 2011*). Similarly, in *Listeria's* actin tail, the  
64 network density decreases exponentially, with a constant rate, and the tail's length is proportional  
65 to the pathogen's speed (*Theriot et al., 1992*).

66  
67 As demonstrated both *in vivo* and *in vitro*, proteins of the ADF/Cofilin family play a key role in the  
68 actin disassembly (*Bamburg, 1999*), debranching the network, severing the filaments (*Blanchoin*  
69 *et al., 2014*) and accelerating depolymerization at filaments' ends (reviewed in *Carlier and Shekhar*  
70 *(2017)*). Microscopic details of the ADF/Cofilin-mediated kinetics of actin filaments at the molecular  
71 level are being clarified (*Wioland et al., 2017*), but so far there is little understanding about how  
72 the net rate of the network disassembly, rather than that of individual filaments, is determined  
73 by the geometry and architecture of the network and by the actin and ADF/Cofilin concentrations.  
74 Furthermore, spatio-temporal dynamics of ADF/Cofilin and its relation to the network disassembly  
75 remains obscure. Lastly, actin-network steering, linked to the regulation of network growth at the  
76 leading edge (*Boujemaa-Paterski et al., 2017*), is essential to understanding directional cell motility,  
77 however, how organization and dynamics of the bulk of the actin network affects the steering is  
78 unclear (*Krause and Gautreau, 2014*). In this study, we investigated how the geometry, architecture  
79 and density of a branched actin network, as well as the ADF/Cofilin concentration, affect the actin  
80 network dynamics, and found key parameters controlling the network length and steering.

81  
82 In order to do that, we combined *in vitro* and *in silico*, approaches. *In vitro* reconstitution  
83 of bacteria and plastic beads propulsion (*Frischknecht et al., 1999; Loisel et al., 1999; Bernheim-*  
84 *Groswasser et al., 2002; Akin and Mullins, 2008; Dayel et al., 2009; Achard et al., 2010; Kawksa*  
85 *et al., 2012*), and of lamellipodial network growth (*Bieling et al., 2016; Boujemaa-Paterski et al.,*  
86 *2017*) brought insights on how a minimal set of just two molecular actions – Arp2/3 complex-driven  
87 nucleation and barbed-end capping – can result in the actin leading edge organization and growth.  
88 In this study, we added ADF/Cofilin to the mixture of actin, Arp2/3 complex and capping protein in an  
89 experimental chamber with nucleation promoting factors (NPFs) localized to micro-printed patterns  
90 on the surface. We generated a diversity of patterns and studied the impact of the geometry and  
91 actin density on the length of dynamic actin networks. We also used quantitative fluorescence  
92 imaging to measure the spatial and temporal behavior of the actin and ADF/Cofilin densities and

93 their relations with the network length. Crucially, we varied independently three parameters – actin  
94 network density, ADF/Cofilin concentration and network width – and measured their effect on the  
95 network length.

96  
97 Mathematical modeling was very successful in deciphering the data from *in vitro* experiments on  
98 the actin disassembly (Roland *et al.*, 2008; Berro *et al.*, 2010; Michalski and Carlsson, 2010, 2011;  
99 Reymann *et al.*, 2011; Stuhmann *et al.*, 2011; Tania *et al.*, 2013). Most theoretical studies either  
100 considered the disassembly of individual filaments (Roland *et al.*, 2008), or a first order reaction of  
101 a continuous network density decrease (Ofer *et al.*, 2011; Reymann *et al.*, 2011; Stuhmann *et al.*,  
102 2011), or treated the disassembly as a boundary condition (Aroush *et al.*, 2017). Pioneering theory  
103 of Michalski and Carlsson (Michalski and Carlsson, 2010, 2011) demonstrated how fragmentation  
104 of the network at the trailing edge resulted from stochastic accumulation of discrete disassembly  
105 events in the network. No studies so far quantitatively connected the dynamics of ADF/Cofilin  
106 accumulation in the actin mesh with the effective disassembly rate and the network length.

107  
108 An intuitive and expected qualitative finding of our study is that equilibrium network length  
109 increases with actin density, and decreases with ADF/Cofilin concentration. The fundamental  
110 breakthrough of the study is quantitative: we found a novel simple mathematical relation allowing  
111 to predict the actin network length from three parameters – actin network density, ADF/Cofilin  
112 concentration and network width – and measured their effect on the network length. Other novel  
113 and unexpected findings are: 1) ADF/Cofilin is locally depleted from solution by binding to actin,  
114 which has profound effects on actin disassembly; 2) Network length depends on the network width;  
115 3) ADF/Cofilin concentration can regulate the steering of heterogeneous actin networks.

## 116 Results

### 117 ADF/Cofilin action establishes equilibrium length of dynamic actin networks

118 We reconstituted branched actin networks (called LMs in the following) that resemble lamellipodia of  
119 motile cells by micro-printing rectangular patterns coated with nucleation-promoting factors (NPFs)  
120 on the 'bottom' of the experimental chamber (Figure 1–Figure Supplement 1A). NPFs activated the  
121 Arp2/3 complex, which in turn generated filament branching, leading to the assembly and growth  
122 of the branched actin network at the rectangular network leading edge pattern (Figure 1A). The  
123 thickness of the experimental chamber ('bottom-to-top distance') is only a few microns, so the actin  
124 networks lift off the NPF pattern, bump into the 'top', bend and then grow parallel to the bottom and  
125 top (Figure 1–Figure Supplement 1B). The networks were flat, similar to the lamellipodial networks:  
126 their thickness was but a few microns, an order of magnitude less than the width and length,  
127 on the order of tens of microns. Importantly, there is capping protein in the reaction mixture,  
128 limiting growth of individual actin filaments and keeping the actin networks compact, not extending  
129 laterally from the NPF pattern. With only actin, Arp2/3 and capping protein in the reaction mixture,  
130 the networks elongated steadily (Figure 1A). The networks' elongation speed  $V$  was an increasing  
131 function of actin density (Figure 1B-C), in agreement with our previous study (Boujemaâ-Paterski  
132 *et al.*, 2017): higher NPF density that causes greater actin density and a moderate depletion of  
133 monomeric actin in the vicinity of the growing barbed ends, also leads to an optimization of the  
134 micro-architecture of the network, which translates polymerization into the network elongation  
135 more effectively for denser networks.

136  
137 Without ADF/Cofilin, the networks elongated steadily and did not disassemble – actin density  
138 along the networks changed only slightly (Figure 1A). Addition of ADF/Cofilin changed the networks'  
139 dynamics: rather than growing steadily, the networks, after reaching a certain length, started to  
140 disassemble at the trailing edge, so that a dynamic equilibrium is reached in which the network  
141 length stayed roughly constant (Figure 2A). The equilibrium length depended on both actin density

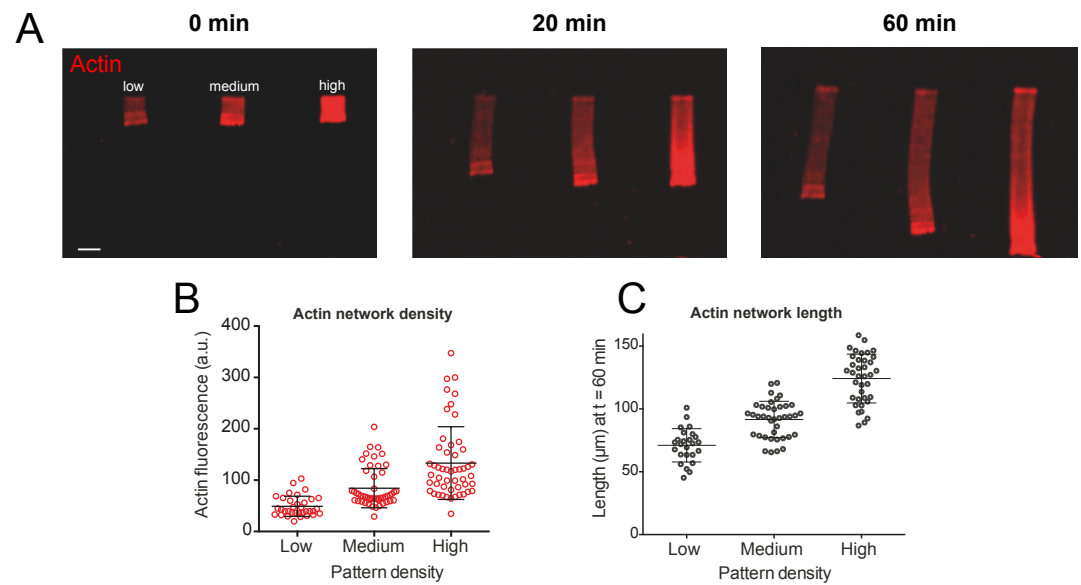

**Figure 1.** Actin density determines network growth speed. A. The growth kinetics of reconstituted lamellipodia (LMs) depend on the density of the grafted NPFs. Conditions: 6  $\mu\text{M}$  actin monomers Alexa-568 labeled, 18  $\mu\text{M}$  profilin, 120 nM Arp2/3 complex, 20 nM capping proteins. Lamellipodia of variable actin filament density (low, medium, high) were initiated by bar-shaped patterns of different NPF-spot densities (see *Figure 1-Figure Supplement 1*) and their growth was followed using the fluorescence of the actin networks. Snapshots of the growing lamellipodium were taken 0, 20 and 60 min after addition of Alexa-568 labeled actin monomers. B. Denser patterns generate denser actin networks. The network density was measured across the LMs (for low density networks,  $n=25$  from 3 experiments, for medium density networks,  $n=41$  from 3 experiments and for high density networks,  $n=38$  from 3 experiments). C. Denser patterns generate longer actin networks. The lengths of the LMs were measured after 60 min and plotted according to the pattern density.

**Figure 1-Figure supplement 1.** Laser micropatterning method and network geometry.

142 and ADF/Cofilin concentration. The addition of ADF/Cofilin did not have a significant effect on the  
143 growth rate of the networks, in contrast to the *in vivo* cases. The reason is that the total amount of  
144 actin in the *in vitro* chamber is vastly greater than the total network actin, and so the polymerizable  
145 actin monomer concentration is unaffected by the actin turnover related to the networks' dynamics;  
146 in other words, actin does not have to be recycled. This has an important consequence for the *in*  
147 *vitro* global treadmill: the rate of the network growth depends on the conditions at the leading edge  
148 (actin density and architecture) but is unaffected by the network length. Thus, the equilibrium length  
149 of the treadmill network is determined by the length-dependent disassembly only: the longer  
150 the network is, the faster is the disassembly at the trailing edge, and so the treadmill length is  
151 determined by the dynamic stable equilibrium, in which the trailing edge disassembly rate is equal  
152 to the leading-edge growth rate. As the leading-edge growth rate is unaffected by ADF/Cofilin, our *in*  
153 *vitro* assay allows to investigate the effect of the ADF/Cofilin-mediated disassembly on the network  
154 length, without complications of feedbacks between disassembly and assembly.

155  
156 Our data revealed that the equilibrium network length decreases with the ADF/Cofilin concentra-  
157 tion and increases with the actin density (*Figure 2A-B*). Qualitatively, these results are very intuitive:  
158 higher ADF/Cofilin concentration increases the disassembly rate, hence the equilibrium between  
159 the leading edge growth and trailing edge disassembly is reached at shorter lengths. If the actin  
160 network is denser at the leading edge, it takes a longer time to break such network down; during  
161 this time, the steadily elongating network grows longer until the disassembly rate at the trailing  
162 edge balances the leading edge growth.

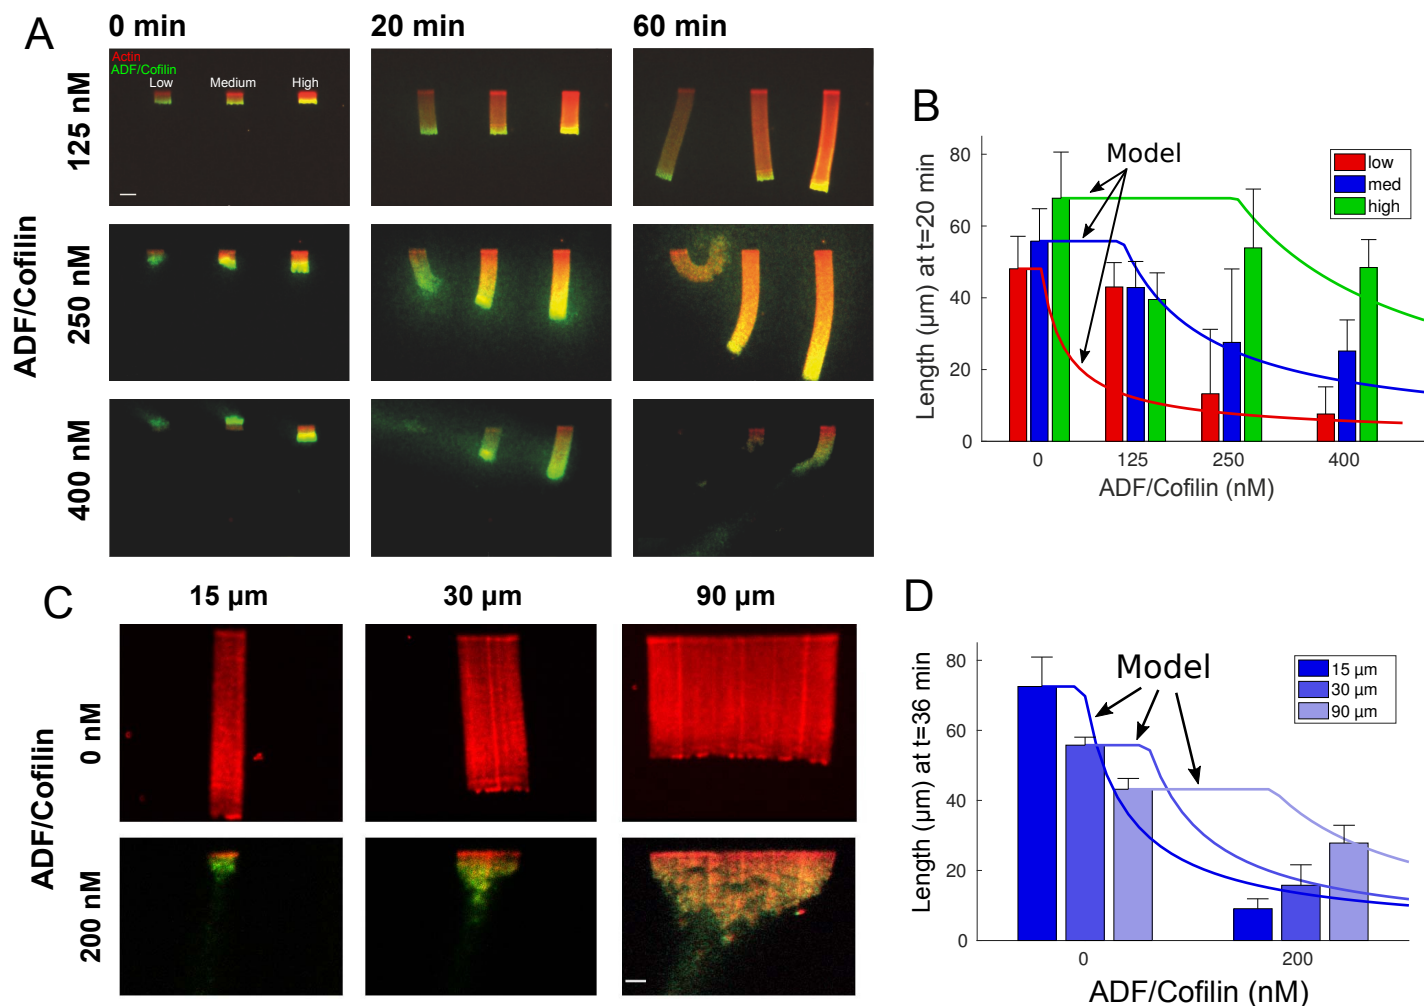

**Figure 2. Actin network density and width set the equilibrium state of LMs.** A. The growth kinetics of LMs in the presence of ADF/Cofilin. The experiment conditions are similar to **Figure 1A** but with addition of variable concentrations of ADF/Cofilin as indicated. Snapshots of the growing lamellipodium were taken 0, 20 and 60 min after addition of actin monomers. Actin monomers are Alexa-568 labeled (red), ADF/Cofilin is labeled with Alexa-488 (green). Scale bar is 15  $\mu\text{m}$ . B. The length of the actin networks as a function of the ADF/Cofilin concentrations were measured after 20 min. Colored bars (red for low, blue for medium and green for high actin density) at 20 min are averages ( $\pm$  standard deviations). Solid lines with corresponding colors are the model prediction according to Sec. Equilibrium length of actin network as a function of biochemical and geometric parameters. The horizontal lines for the model predictions indicate that the networks have not yet reached equilibrium (0 nM ADF/Cofilin,  $n=33$  for low,  $n=41$  for medium,  $n=38$  for high from 3 experiments; 125 nM ADF/Cofilin,  $n=15$  for low, medium and high from 3 experiments; 250 nM ADF/Cofilin,  $n=26$  for low,  $n=27$  for medium and  $n=27$  for high from 3 experiments; 400 nM ADF/Cofilin,  $n=19$  for low, medium and high from 3 experiments). C. Growth of LMs from patterns of different sizes. Biochemical conditions are identical to A and **Figure 1A**. Top panel, LMs in the absence of ADF/Cofilin were initiated from pattern of 3 different sizes (15x3, 30x3 and 90x3  $\mu\text{m}$ ). Snapshots were taken at 36 min after addition of actin monomers (15  $\mu\text{m}$   $n=50$  from 3 experiments, 30  $\mu\text{m}$   $n=59$  from 11 experiments and 90  $\mu\text{m}$ ,  $n=43$  from 10 experiments). See **Figure 2-video 1** for full dynamics. Bottom panel, LMs in presence of 200 nM ADF/Cofilin were initiated from pattern of 3 different sizes (15x3, 30x3 and 90x3  $\mu\text{m}$ ). Snapshots were taken at 36 min after addition of actin monomers. Scale bar is 15  $\mu\text{m}$ . See **Figure 2-video 2** for the full dynamics. D. Measured actin network lengths as a function of ADF/Cofilin concentration. Colored bars are the average length ( $\pm$  standard deviation) of the actin networks 36 min after the addition of actin monomers. Lines show the model prediction of Sec. Equilibrium length of actin network as a function of biochemical and geometric parameters. Horizontal lines for the model predictions indicate that the networks have not yet reached equilibrium.

**Figure 2-video 1.** Growth of LMs from pattern of different size in absence of ADF/Cofilin. LMs were initiated in absence of ADF/cofilin from pattern of 3 different sizes 15  $\mu\text{m}$  (left column), 30  $\mu\text{m}$  (middle column) and 90  $\mu\text{m}$  (right column). Movie playback is 4 frames per seconds. Related to **Figure 2C**.

**Figure 2-video 2.** Growth of LMs from pattern of different size in presence of ADF/Cofilin. LMs were initiated in presence of 200 nM ADF/cofilin (actin is red, ADF/cofilin is green) from pattern of 3 different sizes 15  $\mu\text{m}$  (left column), 30  $\mu\text{m}$  (middle column) and 90  $\mu\text{m}$  (right column). Movie playback is 12 frames per seconds. Related to **Figure 2C**.

## 163 Spatio-temporal ADF/Cofilin dynamics and its local depletion

164 Initial simple model of the ADF/Cofilin dynamics.

165 We wondered if these observations could be explained by a simple model: ADF/Cofilin binds to every  
166 spot of the growing actin network with a constant rate, and does not have an effect on the network,  
167 until a critical density of the bound ADF/Cofilin is reached, upon which the network disassembles  
168 instantly. It is reasonable to assume that ADF/Cofilin binding is a diffusion-limited reaction, and  
169 so its rate is proportional to the product of the ADF/Cofilin concentration in the solution,  $C_0$ , and  
170 of the constant actin filament density,  $A$ . Indeed, when we analyzed the initial rate of binding of  
171 ADF/Cofilin near the leading edge for networks that had just started to grow (using various actin  
172 densities and at various ADF/Cofilin concentrations), we found that this rate is proportional to  
173  $C_0$ . We also found a strong correlation between the initial increase in bound ADF/Cofilin and  $C_0 A$   
174 ( $R = 0.51$ ,  $P < 0.001$ , see the Mathematical Appendix for details). This confirms that at least at the  
175 beginning of network growth, the ADF/Cofilin binding rate is indeed  $k_B C_0 A$ , where  $k_B$  is the binding  
176 constant.

177

If this rate stays constant, then the bound ADF/Cofilin density as a function of time and of  
distance  $y$  from the network leading edge is the solution of the equation  $\partial_t C_B + V \partial_y C_B = k_B C_0 A$ ,  
where  $V$  is the rate of actin network growth at the leading edge. Since newly polymerized actin is  
free of ADF/Cofilin, we can assume  $C_B(y = 0) = 0$ . In dynamic equilibrium, this equations yields the  
solution  $C_B(y, t) = \frac{k_B C_0 A y}{V}$ , which can be easily understood: an actin spot takes time  $y/V$  to drift a  
distance  $y$  from the leading edge. As ADF/Cofilin binds with rate  $k_B C_0 A$ , by that time the bound  
ADF/Cofilin density reaches the value of  $\frac{k_B C_0 A y}{V}$ . Assuming that the network falls apart when a critical  
amount of ADF/Cofilin per actin filament,  $C_B/A = \gamma$ , is reached, this yields an equilibrium network  
length of

$$L_* = \frac{\gamma V}{k_B C_0}.$$

178 This simple model predicts, that the equilibrium network length is proportional to the ADF/Cofilin  
179 concentration in the solution,  $C_0$ , in qualitative agreement with the data (compare **Figure 2A-B**). In  
180 **Figure 2A-B**, we also observe a clear correlation between the actin density and the network length.  
181 Since denser networks also grow faster (**Figure 1C**), our estimate is again in qualitative agreement  
182 with **Figure 2A-B**, however, it appears that the network growth rate increases only weakly with  
183 the actin density, while the equilibrium network length increases dramatically, when the actin  
184 filament density increases. Lastly, the simple model indicates that the equilibrium network length is  
185 independent of the network width.

186 Equilibrium network length increases with the network width.

187 We tested this last prediction experimentally for networks of widths 15, 30 and  $90 \mu\text{m}$ , and the result  
188 shows that this is not the case (**Figure 2C-D**). In fact, we observe that, while for all network widths  
189 their lengths decrease if ADF/Cofilin is added, wider networks are affected less. This suggests  
190 three potential factors that the simple initial model did not take into account: 1) ADF/Cofilin is  
191 unable to diffuse from the solution to the inner parts of the wider dense actin network. 2) There  
192 is a non-local mechanical effect that leads to an effective protection of wider networks against  
193 degradation. 3) Local depletion of ADF/Cofilin. As previously reported (**Boujemaa-Paterski et al.,**  
194 **2017**), actin monomers are locally depleted due to a sink of its concentration in the vicinity of the  
195 growing barbed ends; a similar effect could emerge for ADF/Cofilin.

196

197 To estimate the potential effect of the actin network on the ADF/Cofilin diffusion constant, we  
198 used the theory developed in **Novak et al. (2009)** and described in the Appendix to determine the  
199 effective diffusion constant of ADF/Cofilin inside the actin network. This calculation shows that the  
200 effect of even a dense actin network on the ADF/Cofilin diffusion coefficient is a reduction by a few  
201 per cent only, i.e. the diffusion constant will be virtually unaffected by the actin network, ruling

202 out the first factor. The second factor, a global mechanical structure of the network, is unlikely,  
203 since the average actin filaments are of sub-micron size, two orders of magnitude shorter than the  
204 network width, and long actin bundles are absent. Thus, we decided to investigate the third factor,  
205 local depletion of ADF/Cofilin.

206 Rate of ADF/Cofilin binding decreases with time.

207 According to the simple initial model, the rate of ADF/Cofilin binding to an actin spot,  $k_B C_0 A$ , should  
208 be constant, and so if we focus on such a spot drifting from the leading edge backward with a  
209 constant speed, we should measure linear increase of the ADF/Cofilin density with the slope that  
210 does not depend on the time when the spot originates. We measured the initial increase of the  
211 ADF/Cofilin density,  $\dot{C}_B$ , near the leading edge by making measurements at different starting times  
212 for each network. We indeed found that the increase of the ADF/Cofilin density is linear with time,  
213 however, the rate of ADF/Cofilin binding decreased with starting time (**Figure 3A-B**), rather than  
214 remaining constant.

215 ADF/Cofilin is locally depleted by binding to the growing actin network.

To confirm that the decrease of the ADF/Cofilin binding rate with time is due to the local ADF/Cofilin  
depletion, we analyzed the simplest model of the spatial-temporal ADF/Cofilin dynamics compatible  
with our observation. In the model, the density of free ADF/Cofilin molecules diffusing in the solute  
is denoted by  $C_F(x, y, t)$ . Since the experimental chamber's depth in  $z$ -direction is much smaller than  
all characteristic dimensions (including those of the actin network) in  $x$ - and  $y$ -directions, we use a  
2D setting for modeling, with the space variables  $(x, y) \in \mathbb{R}^2$ . In the simulations, an actin network of  
width  $W$  and length  $L(t) = tV$  is positioned at  $\mathcal{N} = [-W/2, W/2] \times [0, L(t)]$ . The model consists of  
the following equations:

$$\partial_t C_B + V \partial_y C_B = r_B A C_F - r_U C_B, \quad (1)$$

$$\partial_t C_F = D \Delta C_F - r_B A C_F + r_U C_B. \quad (2)$$

$$C_F(x, y, 0) = C_0, \quad C_B(x, y, 0) = 0.$$

$$A(x, y, t) = 0, \quad (x, y) \notin \mathcal{N}.$$

216 Here Eqs. (1) and (2) describe drift of the bound and diffusion of free ADF/Cofilin molecules, re-  
217 spectively, and the reactions of ADF/Cofilin binding to and slow unbinding from actin filaments.  
218 The third line gives the initial conditions. As boundary condition for  $C_B$  we use  $C_B(x, 0, t) = 0$ . Other  
219 boundary conditions and the numerical procedure for solving the model equations are discussed  
220 in the Appendix, but note that the macroscopic model does not account for an ATP-F-actin band,  
221 for which ADF/Cofilin has a much lower affinity. The reason is that such an ATP-F-actin band is very  
222 narrow (see Discussion for details).

223

224 In these equations, the actin density is zero away from the growing rectangle representing the  
225 actin network. The model does not describe actin disassembly, as we model the effect of ADF/Cofilin  
226 on actin filaments below in the next section. Thus, on this rectangle, we either assume the actin  
227 density to be constant for rough estimates (the measurements show that the actin density changes  
228 relatively little along the network before plunging at the trailing edge, see **Figure 3E**), or equal to the  
229 measured function of the  $y$ -coordinate to compare with the data.

230

We can use (2) with constant actin filament density  $A$  to estimate the local concentration of free  
ADF/Cofilin near the actin network: The flux of the free ADF/Cofilin to the network by diffusion,  
 $(C_0 - C_F)D$ , has to balance the 'consumption' of the free ADF/Cofilin by binding to the network, i.e.

$$(C_0 - C_F)D \approx WL(r_B C_F A - r_U C_B),$$

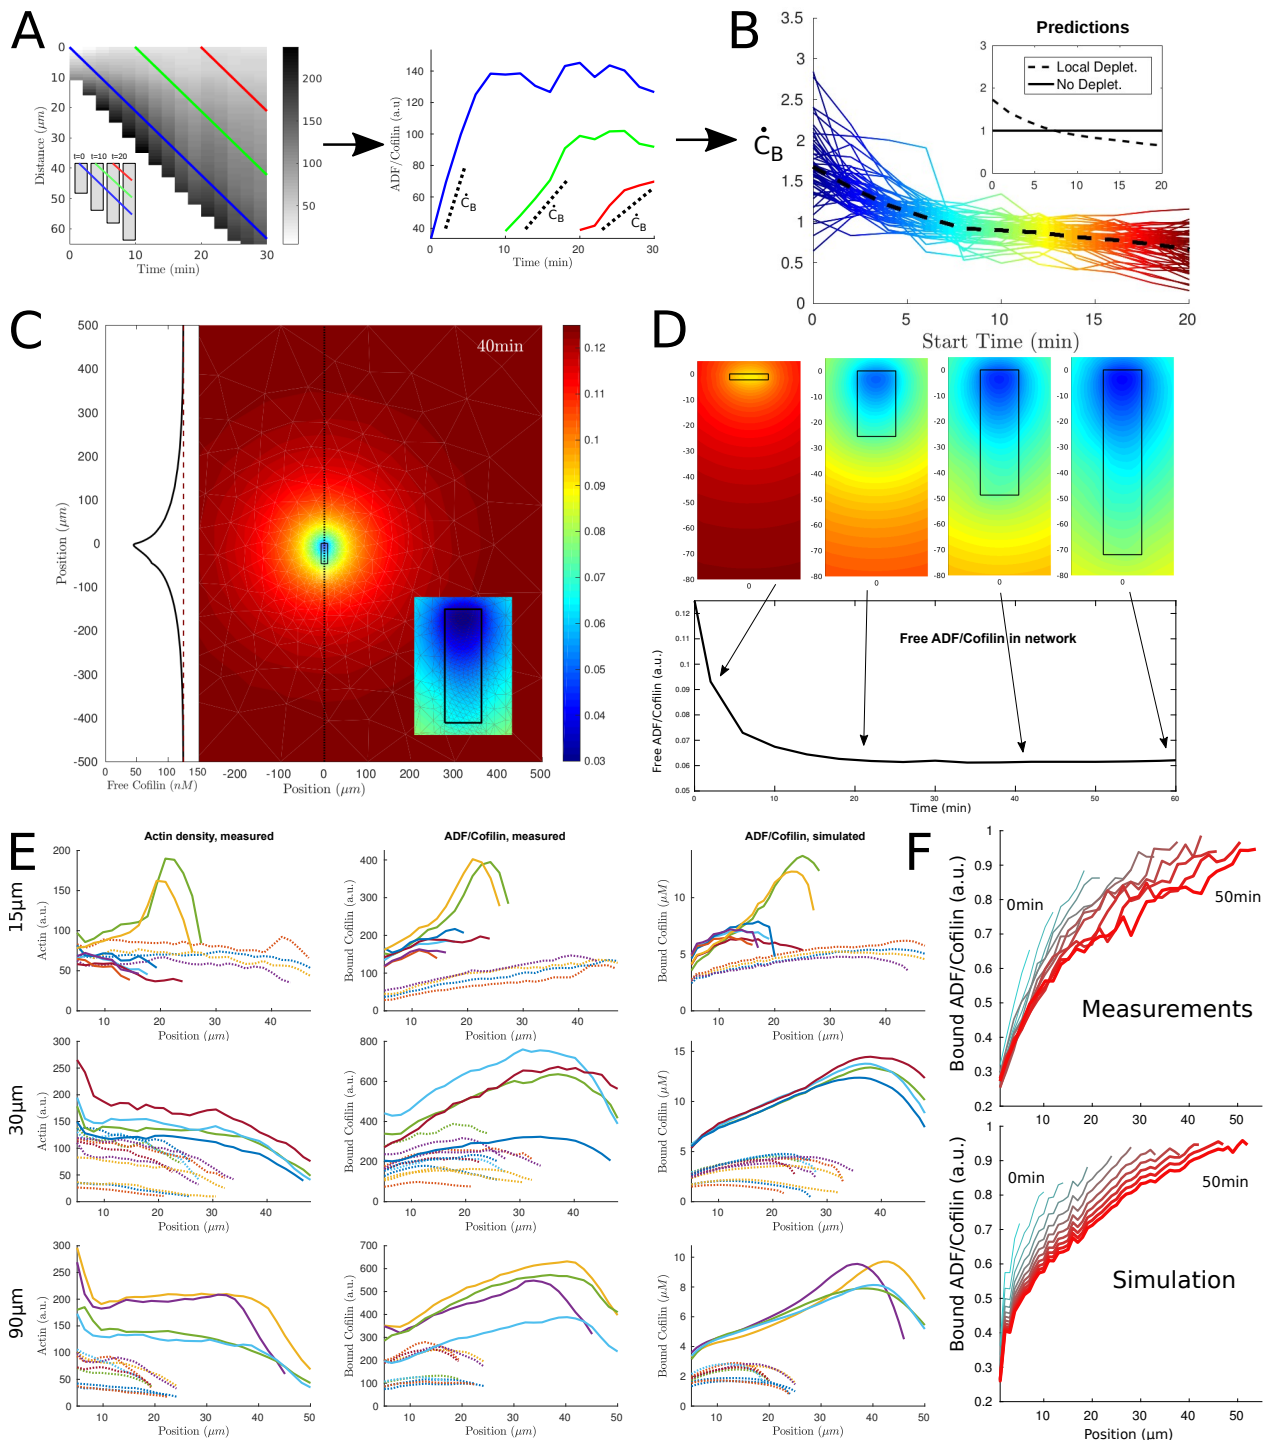

**Figure 3. ADF/Cofilin dynamics.** A: Measurement procedure. Left: Example kymograph of bound ADF/Cofilin density as a function of space and time. Colored lines show paths along which the amount of bound ADF/Cofilin was measured. Right: The measurements along the paths. Dotted lines show initial increase. B: normalized values of the initial increase as a function of starting time. Inset: Predictions for local depletion and no local depletion. C: Simulation of (1)-(2). Snapshot at time  $t = 40\text{min}$  showing the concentration of free ADF/Cofilin. Parameters:  $V = 1.16\mu\text{m}/\text{min}$ ,  $r_B = 0.5/\text{min}/\mu\text{M}$ ,  $r_U = 0.31/\text{min}$ ,  $A = 50\mu\text{M}$ ,  $C_0 = 125\text{nM}$ . Inset left: Concentration of free ADF/Cofilin along the dotted line. Inset right: Zoom around the network. D: Time snapshots of the same simulation, colors represent free ADF/Cofilin. Below: Average amount of free ADF/Cofilin in the area covered by the network. E: Using the measured actin data at 20min as input into the model (left column), we compare the measured (middle column) and simulated (right column) ADF/Cofilin density along the network (the x-axis represents the distance to the leading edge). Shown are examples of networks of varying width (top row:  $15\mu\text{m}$ , middle row:  $30\mu\text{m}$ , bottom row:  $90\mu\text{m}$ ) with varying amounts of added ADF/Cofilin (dotted lines:  $200\text{-}250\text{nM}$ , solid lines:  $400\text{-}500\text{nM}$ ), colors help distinguish between different networks. Concentrations of actin and ADF/Cofilin were averaged across the network width. F: Example for concentration of bound ADF/Cofilin averaged along the network for an example network, measured (up) and simulated (down). Line color and line thickness represent different time points.



which implies

$$C_F \approx \frac{C_0 D + W L C_B r_u}{D + A W L r_B}. \quad (3)$$

Below, we show that the unbinding of ADF/Cofilin is very slow; besides, near the leading edge,  $C_B \approx 0$ , and so:

$$\dot{C}_B \approx \frac{r_B A C_0 D}{D + A W L r_B}.$$

231 When the network grows, its length  $L$  increases, and hence, as shown by these formulas, the local  
232 concentration of free ADF/Cofilin near the actin network decreases with time, and so does the  
233 rate of ADF/Cofilin binding at the leading edge, in agreement with the measurements (**Figure 3B**).  
234 This provides a direct demonstration of the local depletion of ADF/Cofilin due to the diffusion and  
235 binding to the network. We simulated the full 2D model (1)-(2) using parameters estimated from  
236 our data and taken from the literature (details in the Appendix) and find a significant depletion ef-  
237 fect near the network where the free ADF/Cofilin concentration drops by as much as 50% (**Figure 3D**).

238  
239 To further test the model, we used the measurements of the actin density along the networks  
240 giving us functions  $A(y)$  for tens of the networks of various densities at a certain time after the actin  
241 growth was initiated, and simulated (1)-(2) with these functions. This allowed direct comparison  
242 of measured and predicted ADF/Cofilin concentrations along the network. **Figure 3E-F** shows that  
243 the model recapitulates the distance-dependent concentrations and relative amounts of bound  
244 ADF/Cofilin very well. We note that ADF/Cofilin unbinding predicted by the model is slow; omitting  
245 the effect of ADF/Cofilin unbinding (i.e. setting  $r_U = 0$  in the model) makes the fits to the data less  
246 perfect, however, the estimates of the overall amount of bound ADF/Cofilin changes little.

## 247 **Equilibrium length of actin network as a function of biochemical and geometric** 248 **parameters**

249 **Actin network fragmentation at the trailing edge.**

250 When one observes the time lapse data of actin network dynamics at the trailing edge, it becomes  
251 apparent that the network does not disassemble continuously, but rather small, micron-size, pieces  
252 of the network break off (**Figure 4A**). Thus, the network disassembles by macroscopic fragmenta-  
253 tion. To capture this dynamics, we followed the theory introduced in *Michalski and Carlsson (2010,*  
254 *2011)* and modeled the network as a 2D ensemble of edges connected by nodes. We emphasize  
255 that this representation is highly idealized, and the that the edges do not stand for individual  
256 filaments, but rather represent actin filaments arrays; similarly, nodes are not individual physi-  
257 cal Arp2/3 complexes, but are abstracted crosslinking and/or branching points. We model the  
258 disassembling effect of ADF/Cofilin by removing the nodes with certain rate,  $P$ . Once a piece of  
259 the network becomes disconnected from the main body of the network due to this edge removal,  
260 we assume that this piece diffuses away and we delete it. **Figure 4C** illustrates how the model works.

261  
262 The key to the model behavior is setting rules that describe how the rate of breakage per node  
263 varies spatially. It is natural to assume that this rate is a function of local densities of filamentous  
264 actin and bound ADF/Cofilin. We also assume, for simplicity, that we can neglect a potentially  
265 complex effect of sequential biochemical reactions preceding the breakage events. As we already  
266 mentioned, the effect of fast hydrolysis on actin filaments is, in fact, negligible. Considering that  
267 both modeling and data shows that the bound ADF/Cofilin density changes little compared to actin  
268 near the trailing edge, we assume that the rate of breakage is a function of a spatially constant  
269 bound ADF/Cofilin density. Thus, in the model, the rate of breakage (node disappearance) varies  
270 locally due to spatial variation of the local density of the actin network (we calculate the local density  
271 of the discrete network as a weighted average of the number of the network edges in the vicinity of  
272 a given node; details in the Appendix). It is reasonable to assume that the node breakage rate would

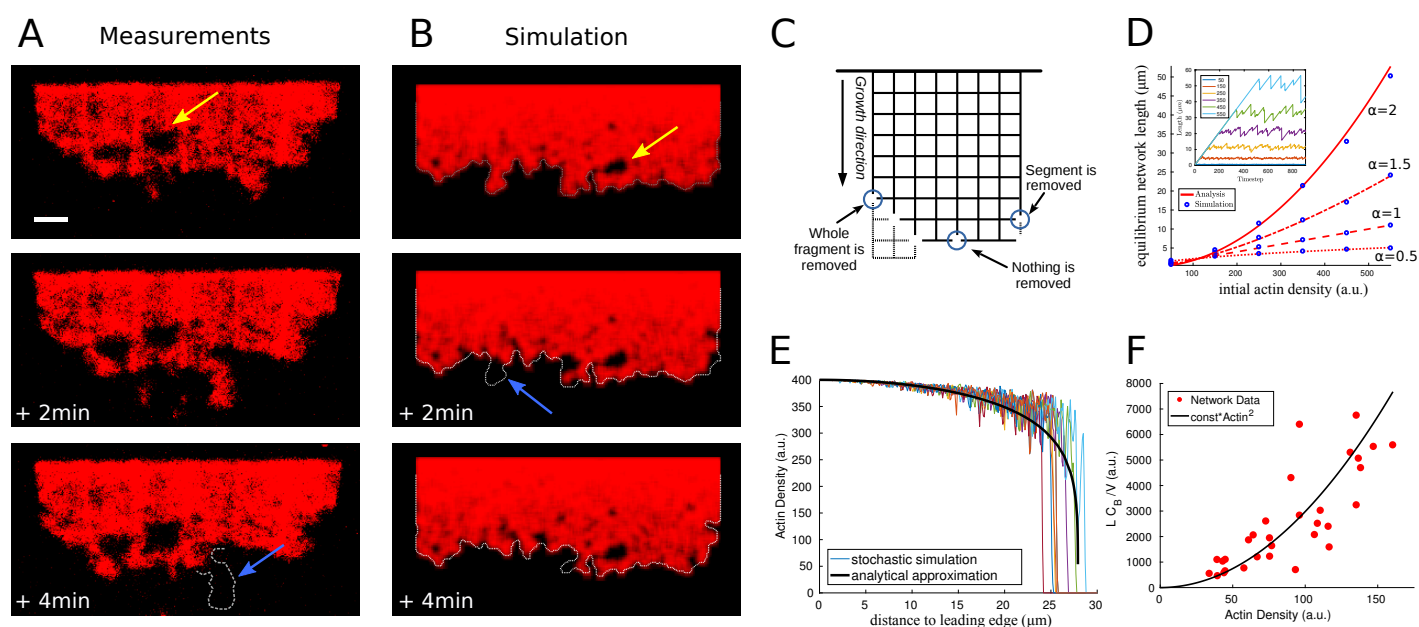

**Figure 4. Network fragmentation.** A: Snapshots of experimental measurements of actin density (red) at three consecutive time points. The yellow arrow shows a hole in the network, the dotted outline and blue arrow the breakage of a large piece of network. The network width is 90  $\mu\text{m}$ , the ADF/Cofilin concentration 200 nM. See [Figure 4-video 1](#), right for the full time dynamics. B: Simulation snapshots for three consecutive time steps. Colors and arrows as in A, dotted lines show the shifted outline of the network in the previous time step. As parameters the same width, network speed and initial actin concentration as measured for A were used (compare Appendix). See [Figure 4-video 1](#), left for the full time dynamics. C: Shown is the simulation setup. Collections of branches are represented by nodes connecting collections of actin filaments, represented by edges between nodes. In every time step the network is shifted in growth direction. At each node the breakage rate is determined in dependence of the local density of actin. The three circles show three different breakage events and their effects. D: Comparison between the simulated equilibrium length and the analytical prediction using (4) for different values of the initial actin density and exponents  $\alpha$ . Inset: The fluctuating network lengths as a function of time for various values of initial actin for  $\alpha = 2$ . E: Comparison between the actin density in the stochastic fragmentation simulation (thin lines) and the analytical approximation (thick black line). F: Showing the quadratic dependence of equilibrium length on actin density using measurements of the equilibrium network length ( $L$ ), the network speed ( $V$ ) and the average concentration of bound cofilin ( $C_B$ ). B, D, E: For details and parameters see the Appendix.

**Figure 4-video 1.** Video comparing fragmentation in the measurements (right) and the discrete network model (left) corresponding to [Figure 4A,B](#).

273 be a decreasing function of the actin filament density, as greater density of the actin filaments  
 274 means also a greater density of the branching/crosslinking points, and effectively a number of such  
 275 points per unit volume constitute a node.

276

277 Thus, we used the relation  $P \propto \frac{C_B^\beta}{A^\alpha}$ , where  $C_B$  is the spatially constant concentration of bound  
 278 ADF/Cofilin,  $A$  is the local density of the discrete network, and  $\alpha$  and  $\beta$  are positive exponents that  
 279 we varied in the simulations. We found that for many values of these exponents, the model was  
 280 able to recapitulate several key features of the observed actin network disassembly ([Figure 4B](#)).  
 281 Specifically, the modeled dynamic networks were fragmenting at the trailing edge and forming holes  
 282 near the edge. Analogously to the observations, we found that the modeled networks, after an  
 283 initial period of growth, reached an equilibrium length, around which the network length fluctuated  
 284 stochastically ([Figure 4D](#) inset). The model also predicted correctly the relatively small variation of  
 285 the actin density along the network length, with a sharp drop at the trailing edge ([Figure 4E](#)).

286

For comparison with data, it is useful to derive an analytical approximation of the discrete,  
 stochastic model. In the Appendix, we introduce continuous deterministic densities of actin filament  
 and of broken nodes in the network, derive differential equations for these densities and solve  
 these equations. This continuous deterministic model allows deriving analytical expression for

the equilibrium network length  $L$  as the function of three parameters, average bound ADF/Cofilin density,  $C_B$ , initial actin network density,  $A_0$ , and rate of the network growth at the leading edge,  $V$ :

$$L \propto V \frac{A_0^\alpha}{C_B^\beta}. \quad (4)$$

287 **Figure 4D** shows excellent agreement between the analytical approximation (4) and the correspond-  
288 ing network simulations.

289

290 To determine the values of the exponents  $\alpha$  and  $\beta$ , we examined all networks in the experiments  
291 that have reached equilibrium, measured the values of parameters  $L$ ,  $V$ ,  $A_0$  and  $C_B$  (for  $C_B$  we used  
292 the average across the network) for each network, and compared the actual equilibrium lengths  
293 to the ones predicted by formula (4) based on the measured values of parameters  $V$ ,  $A_0$  and  $C_B$ .  
294 We found that for any  $\alpha \in [1, 3]$  and  $\beta \in [0.5, 1.2]$ , we had  $R^2$ -values of over 0.7, and  $p < 10^{-7}$ . In the  
295 following we use  $\beta = 1$ ,  $\alpha = 2$  ( $R^2 = 0.72$ ,  $p < 10^{-8}$ ). **Figure 4F** shows the quadratic dependence of the  
296 equilibrium network length on the initial actin density. This fit suggests that rate of disassembly  
297 of the effective network nodes is proportional to the bound ADF/Cofilin density and inversely  
298 proportional to the square of the local actin density. We discuss implications of this finding below.

299 Balance between accumulation of ADF/Cofilin in longer networks and accumulation of  
300 network-breaking events predicts equilibrium network length.

We can now combine the results from two models – for ADF/Cofilin binding and for network disassembly – to understand how the ADF/Cofilin dynamics and network fragmentation determine the equilibrium network length. In light of the relation

$$L \propto V \frac{A_0^2}{C_B}, \quad (5)$$

all that remains is to use the model from the previous section to estimate the average density of bound ADF/Cofilin  $C_B$  and substitute the value into Eq. (5). In the Appendix, we derived the following analytical estimate, based on the analysis of Eqs. (3) and (1):

$$C_B \propto \frac{r_B A_0 C_0 L}{V} \times \frac{D}{r_B A_0 W L + D}, \quad (6)$$

301 which provides an explicit formula for the average density of bound ADF/Cofilin as a function of the  
302 leading edge actin density, rate of the network growth at the leading edge, the network dimensions  
303 and baseline ADF/Cofilin concentration. This estimate has a simple interpretation: The first factor  
304 gives the average amount of the bound ADF/Cofilin in the absence of depletion. This amount is  
305 proportional to the actin density, baseline ADF/Cofilin concentration and network length because  
306 the ADF/Cofilin binding rate is proportional to the actin density and solute ADF/Cofilin concentration.  
307 Further the longer the network, the more time it grows allowing more ADF/Cofilin to bind. By a  
308 similar argument, faster network growth allow less time for ADF/Cofilin to bind. The second factor  
309 in Eq. (6) represents a depletion factor, between 0 and 1, which shows by which fraction the local  
310 free ADF/Cofilin concentration near the network is decreased relative to the baseline concentration  
311  $C_0$ . The larger the network (width  $W$  or length  $L$  or both are large), or the denser the network  
312 ( $A_0$  is large), the more ADF/Cofilin is depleted. Finally faster diffusion (greater value of diffusion  
313 coefficient  $D$ ) reduces the effect of depletion.

314

315 Note that the estimated amount of bound ADF/Cofilin in Eq. (6) depends on the equilibrium  
316 length  $L$  itself. Thus, the network equilibrium length is determined by the balance between two  
317 feedbacks (**Figure 5A**): the network length is shortened by higher ADF/Cofilin density, while the  
318 bound ADF/Cofilin density is increased by the network length. Mathematically, the first feedback is  
319 expressed by Eq. (5) and effectively gives the bound ADF/Cofilin density as the decreasing function  
320 of the network length, while the second feedback is expressed by Eq. (6) that gives the bound

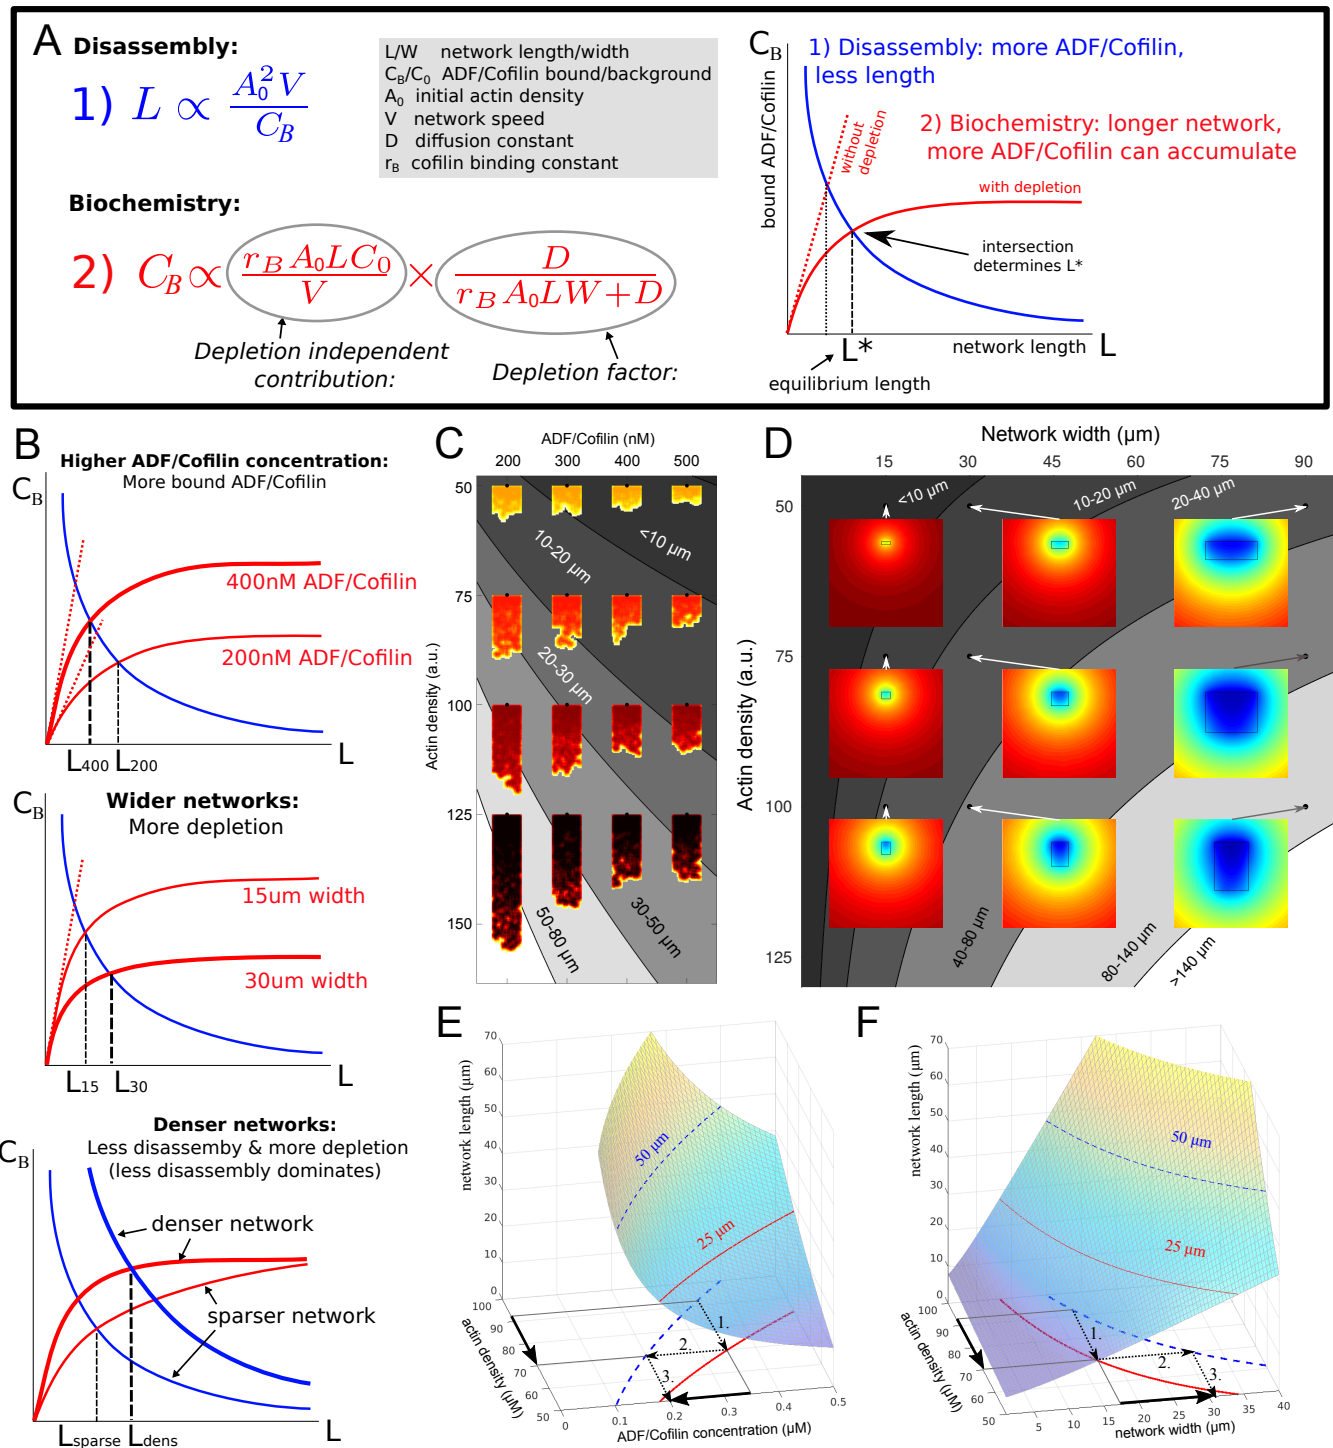

**Figure 5. Model Explanation.** A: Explanation of the two effects determining equilibrium network length: Feedback 1 (Eq. (5), blue equation and curve) shows the effect of disassembly, feedback 2 (Eq. (6), red equation and curve) the effect of ADF/Cofilin binding dynamics. Left: The intersection of the two curves in the  $(L, C_B)$  plane determines the equilibrium network length marked by  $L^*$ . B: Effect of varying the ADF/Cofilin concentration, the network width and the network density on the equilibrium network length. C: Depicted are the predicted equilibrium networks lengths, if ADF/Cofilin concentration and actin density are varied. Gray colors represent regions of similar equilibrium network length. Shadings of red show actin density (black=high, yellow=low). The network shapes were calculated using the fragmentation model. D: Depicted are the predicted equilibrium networks lengths, if network width and actin density are varied. Gray colors in the background represent regions of similar equilibrium network length. Colored insets show the simulated amount of unbound ADF/Cofilin (blue=low, red=high). E-F: Depiction of how different combinations of control variables can lead to the same network length. See text for details.

321 ADF/Cofilin density as the increasing function of the network length (**Figure 5A**). Together, these  
 322 two equations constitute an algebraic system of equations for two variables –  $L$  and  $C_B$  – that has a  
 323 unique solution for each value of four parameters  $A_0, C_0, V, W$  given graphically by the intersection  
 324 of two curves for the relations  $C_B(L)$  given by Eq. (6) and Eq. (5) as shown in **Figure 5A**. In particular,  
 325 since these two curves will always intersect, the network will reach some equilibrium length for  
 326 any parameter combination. The effect of varying individual factors can now easily be understood  
 327 (**Figure 5B**) and allows to elucidate the experimental observations from **Figure 2**: Increasing the  
 328 ADF/Cofilin concentration leads to more bound ADF/Cofilin and thereby shorter networks (**Figure 5B**,  
 329 top). Interestingly increasing network density leads to less disassembly on the one hand, but also to  
 330 more depletion. However, overall, the increased stability dominates over the depletion effect, and  
 331 denser networks grow longer (**Figure 5B**, bottom). **Figure 2B** shows very good agreement between  
 332 the model and the measurements. In the second experiment in **Figure 2C-D**, wider networks were  
 333 less affected by ADF/Cofilin. The model suggests that this is because wider networks lead to more  
 334 depletion and hence longer networks (**Figure 5B**, middle), again in excellent, quantitative agreement  
 335 with the measured lengths **Figure 2D**.

### 336 ADF/Cofilin regulates steering of heterogeneous networks

337 In *Boujema-Paterski et al. (2017)* we found that network heterogeneity – varying actin filament  
 338 density along the network leading edge – induces network steering, in the sense that the hetero-  
 339 geneous network grows curved. We explained this effect by the observation that the denser part  
 340 of the network grows faster than the less dense part. Since these two parts of the network are  
 341 interconnected, the only way for two network parts of different lengths to stick together is if they  
 342 grow along the arc of a circle. Then the faster part with the long axis further from the circle's center  
 343 can grow longer, while advancing along the same arc length as the slower part (**Figure 6Ac**). This  
 344 argument was purely geometric and implicitly assumed that the networks are plastic, bending  
 345 freely. In fact, most likely the networks are elastic or viscoelastic (*Gardel et al., 2004*), which affects  
 346 their bending behavior.

347

To simulate the steering heterogeneous network, we modeled the two networks as two elastic  
 beams growing side-by-side. The networks had different densities and different growth speeds;  
 we took the values of those from the data (**Figure 6D**). We used the result of *Gardel et al. (2004)*  
 that the actin network elasticity  $E$  scales with actin density  $A$  as  $E \propto A^{2.5}$ . We therefore modeled the  
 networks as two attached beams of width  $W$ , growing at speeds  $V_1$  and  $V_2$ , with elastic moduli  $E_1$   
 and  $E_2$ . In the absence of ADF/Cofilin we can assume that the densities and hence elasticities stay  
 constant along the network. In the Appendix we demonstrated, that in mechanical equilibrium, the  
 heterogeneous network forms a bent shape with constant curvature  $\kappa$  (**Figure 6A-C**):

$$\frac{1}{\kappa} = \frac{1}{W} \left( \frac{V_1 + V_2}{V_1 - V_2} + (\sigma - 1) \frac{V_1 \sigma - V_2}{4\sigma(V_1 - V_2)} \right), \quad (7)$$

growing with speed:

$$V_h = \frac{V_1 + V_2}{2} - \frac{(V_1 - V_2)(V_1^2 \sigma^2 - V_2^2)}{2(V_1^2 \sigma^2 + 6V_1 V_2 \sigma + V_2^2)} \quad (8)$$

348 Here  $\sigma = E_2/E_1$  is the ratio of the elastic moduli. The dependencies of the curvature and combined  
 349 network length on parameter  $\sigma$  are depicted in **Figure 6B** and **C**, respectively. Note that if both  
 350 networks have the same elastic properties, i.e.  $\sigma = 1$ , the heterogeneous network elongates with the  
 351 average speed slightly less than  $(V_1 + V_2)/2$ , and the radius of curvature has the much simpler form  
 352  $1/\kappa = (1/W)(V_1 + V_2)/(V_1 - V_2)$ , an approximation that has been used in *Boujema-Paterski et al.*  
 353 (*2017*). The steering direction (right or left) is solely determined by which part of the network grows  
 354 faster – the heterogeneous network always steers towards the slower sub-network. Differences  
 355 in elasticity, however, can influence the amount of steering in a complex way. **Figure 6A-C** shows

356 that if one of the networks is very sparse (and hence weak elastically), the heterogeneous network  
 357 becomes almost straight. There is a maximal steering curvature achieved for a certain elasticity  
 358 ratio depending on the ratio of the speeds of the sub-network growth.

359  
 360 To assess the effect of ADF/Cofilin on heterogeneous networks, we used the model from the  
 361 previous sections to calculate the equilibrium lengths of the two sub-networks and simulate the  
 362 heterogeneous networks. Since the two sub-networks compete for the same pool of ADF/Cofilin,  
 363 we need to adjust the depletion factor in Eq. (6). As described in the Appendix we can determine  
 364 two equilibrium lengths  $L_1$  and  $L_2$  of the sub-networks. Effectively both networks will reach longer  
 365 lengths together than in isolation, since there is more local depletion of ADF/Cofilin in the combined  
 366 network. In addition, the sparser network is affected more by the depletion, as the denser networks  
 367 'uses up' disproportionately more ADF/Cofilin. Also, the network densities are not constant along  
 368 the sub-networks, thereby leading to varying elasticities along the network. In terms of the model,  
 369 this means that the parameter  $\sigma$  becomes a function of the distance from the leading edge. Finally,  
 370 the sparser sub-network has a trailing edge much closer to the leading edge than the dense one.  
 371 Altogether, these factors mean that in the presence of ADF/Cofilin, the heterogeneous network will  
 372 initially (closer to the leading edge) have the same curvature as without ADF/Cofilin. Further away  
 373 the curvature decreases until the shorter sub-network fully disassembled, after which the longer

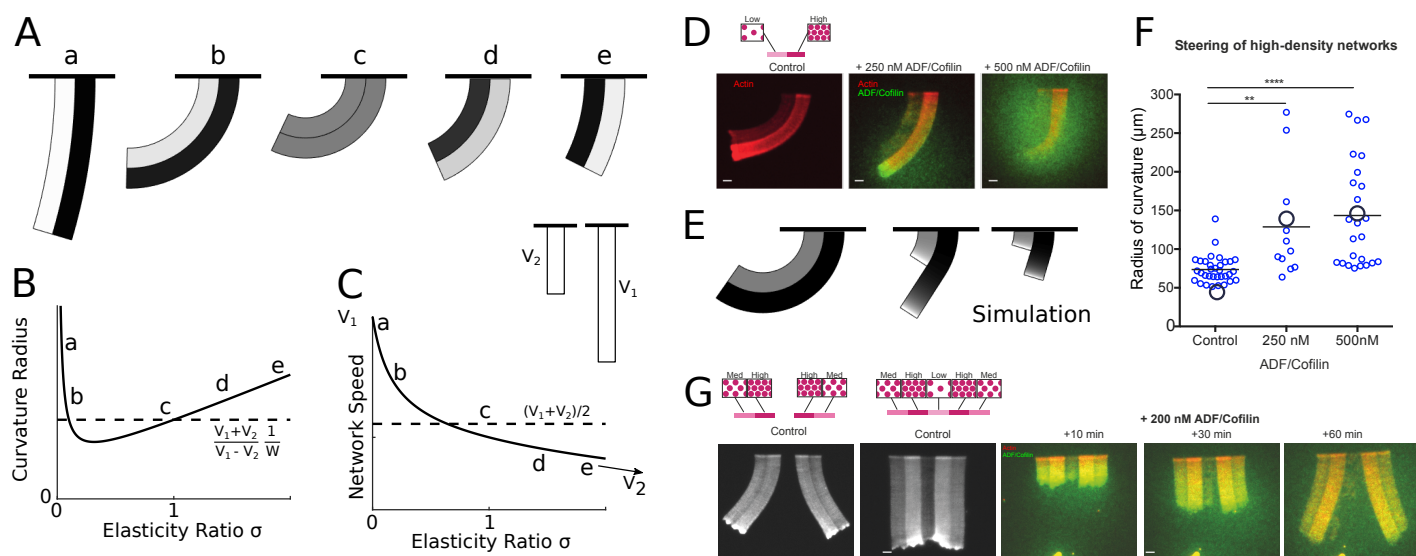

**Figure 6.** ADF/Cofilin controls the steering of heterogeneous actin network. A-C: Modeling steering without ADF/Cofilin. A: Model predictions of how differences in density influence the curvature and length of the heterogeneous LM. Darker colors signify denser networks, in all cases does the left LM grow half as fast as the right LM. B,C: Dependence of the curvature radius and speed of the heterogeneous LM on the elasticity ratio  $\sigma$ . The dashed line shows reference values, a-e mark the examples shown in A. D-F: Influence of ADF/Cofilin on the heterogeneous LM for concentrations 0, 250 nM and 500 nM. D. A pattern was generated with an array of spots of two distinct densities (left: low density, right: high density) both coated with the same concentration of NPFs. The heterogeneous pattern induces the growth of a heterogeneous actin network that steers toward the actin network with the lower density (left panel). Addition of 200 nM ADF/Cofilin selectively disassembles the low density networks (middle panel). Addition of 500 nM ADF/Cofilin fully disassembles the low density actin network and disassembles partially the high density network (right panel). Snapshots were taken at 30 min after the addition of the actin monomers. E: Simulated network shapes and network densities, darker colors signify denser networks. F: Measured curvature radius, experimental (small blue circles) and simulated (large black circles). For the simulations we calculated an average curvature radius. G. ADF/Cofilin induces steering within heterogeneous actin networks. We generated complex patterns made of heterogeneous spots density (medium and high spot densities) that are connected (right) or not (left) by a low density pattern. Addition of 200 nM ADF/Cofilin selectively disassembles the low density actin network induces the steering of the medium/high heterogeneous actin networks. See **Figure 6-video 1** for full time dynamics. A-C, E: Details in the Appendix.

**Figure 6-video 1.** Selective disassembly of heterogeneous networks by ADF/Cofilin induces steering. LMs were initiated from a low density pattern surrounded by two medium and high patterns (see cartoon in **Figure 6G**) in absence (left column) or in presence (right column) of 200 nM ADF/Cofilin. Movie playback is 6 frames per seconds. Related to **Figure 6G**.

374 sub-network is the only one remaining, and it continues to grow straight. **Figure 6E** shows that  
375 numerical simulations confirm these arguments and generate predictions for various ADF/Cofilin  
376 concentrations.

377

378 We imaged the curving heterogeneous networks (**Figure 6D**) and found that indeed increased  
379 ADF/Cofilin concentration straightens the combined network (**Figure 6F**) due to selective disassem-  
380 bly of the sparser sub-network and relieving the elastic constrain on the denser sub-network. The  
381 data not appear qualitatively like the predicted shapes, the measurements of the average curvatures  
382 give the same values as those predicted by the model (**Figure 6F**). Note, that the curvature changes  
383 very little on average when ADF/Cofilin concentration is increased from 250 to 500  $nM$  because in  
384 both cases the sparser sub-network is almost completely disassembled.

385

386 A dramatic illustration that the effect of ADF/Cofilin can not only straighten, but also induce  
387 steering in heterogeneous networks, which grow straight in the absence of ADF/Cofilin, is given  
388 by the assay shown in **Figure 6G**. In this assay, the sparse sub-network was in the middle; two  
389 denser networks were at the sides of this central sub-network, and two more sparse sub-networks  
390 flanked the denser ones at the edges. Without ADF/Cofilin, such combined network grew straight  
391 due to its mirror symmetry. Upon addition of ADF/Cofilin, the sparse sub-network in the middle  
392 was selectively disassembled, isolating the right and left heterogeneous networks from each other,  
393 which led to their steering away from each other.

## 394 Discussion

### 395 Summary of the results

396 We found that addition of ADF/Cofilin switched the actin networks' steady length increase to a  
397 'global treadmilling' regime, in which the networks, after an initial growth stage, reach a dynamic  
398 equilibrium, with the network growing at the leading edge and falling apart at the trailing edge,  
399 and its length fluctuating around a constant. We observed that at the trailing edge, the network  
400 was stochastically fragmented into little pieces, rather than depolymerizing microscopically. Experi-  
401 ments showed that the equilibrium network length decreases with ADF/Cofilin concentration, and  
402 increases with the actin density and growing speed. The novel and counter-intuitive observation  
403 that the equilibrium network length increases with network width motivated the formulation of a  
404 computational model for ADF/Cofilin dynamics and subsequent comparison between simulated  
405 and measured spatio-temporal distributions of ADF/Cofilin and actin filament density. This led to a  
406 new insight: ADF/Cofilin is locally depleted from the solution by binding to actin filaments, which  
407 has a profound effect on actin disassembly, explaining why wider treadmilling networks are longer.  
408 While the effect of local depletion of actin monomers due to binding to actin filaments was recently  
409 reported both *in vitro* (**Boujemaâ-Paterski et al., 2017**) and *in vivo* (**Dimchev et al., 2017**), the effect  
410 of local depletion of an actin accessory protein is reported here for the first time, to the best of  
411 our knowledge. This points to the possibility that similar depletion effects of other actin binding  
412 proteins could be important for actin network dynamics or other dense actin organizations.

413

414 The fundamental new findings of our study are quantitative: a single rate of disassembly, pro-  
415 portional to the local bound ADF/Cofilin density and inversely proportional to the square of local  
416 actin network density, can reproduce all experimental results. As a result, we were able to describe  
417 the dynamic equilibrium of actin networks with a simple formula, which we discuss further below,  
418 allowing to predict the length of the actin network as a function of its width, actin filament density,  
419 ADF/Cofilin concentration and growth rate. Finally, we made the novel observation that hetero-  
420 geneous networks grow curved, and that the radius of curvature increases with the ADF/Cofilin  
421 concentration. A model suggests that ADF/Cofilin mediated disassembly effectively changes the  
422 elasticity of the networks in a spatially graded way, which affects the network curvature of hetero-

423 geneous growing networks. Thus, ADF/Cofilin can locally regulate the steering of heterogeneous  
424 networks.

#### 425 Relation to previous studies

426 Our observations and modeling results are in agreement with previous studies: ADF/Cofilin was  
427 observed to be distributed roughly uniformly across keratocyte's and fibroblast's lamellipodia, with  
428 a narrow ADF/Cofilin-free zone at the leading edge (*Svitkina and Borisy, 1999*). Similarly, in *in vitro*  
429 actin tails, the ADF/Cofilin density increased sub-linearly along the tail away from the leading edge,  
430 with the small ADF/Cofilin-free gap near that edge (*Reymann et al., 2011*). Just like our model,  
431 the theory in *Michalski and Carlsson (2011)* predicted an initial slow exponential actin filament  
432 density decay followed by an abrupt decay at the edge of the tail. Such actin density behavior  
433 in lamellipodia of motile keratocytes was reported in *Barnhart et al. (2011); Aroush et al. (2017)*  
434 and other experimental studies. The reason for this density behavior is the cooperative nature of  
435 network fragmentation, which accelerates non-linearly at low actin filament densities and leads to  
436 an abrupt falling apart of the network at the trailing edge (*Michalski and Carlsson, 2010, 2011*).

437  
438 Our model predicts that effective node-breaking events in the network take place on the scale  
439 of one per hundred seconds per micron. This is in agreement with measured severing times  
440 *in vitro* per micron of a filament of hundreds of seconds for 150 nM of ADF/Cofilin and tens of  
441 seconds for 1000 nM of ADF/Cofilin (*Chin et al., 2016*). The predicted proportionality of this rate  
442 to the ADF/Cofilin density is in agreement with the observation of the linear proportionality of the  
443 debranching to the ADF/Cofilin concentration at low concentrations (*Blanchain et al., 2000*). Similar  
444 to *Michalski and Carlsson (2010)*, we found that, remarkably, the properties of the actin networks  
445 with actin subunits switching between many chemical and physical states can be described by a  
446 single effective disassembly rate, proportional to a certain mean of the chemical transition, severing  
447 and debranching rates. The discrete and stochastic fragmentation of the actin network at the  
448 trailing edge was also predicted in *Michalski and Carlsson (2011)*, observed *in vitro* in *Reymann*  
449 *et al. (2011)*, and inferred from *in vivo* data in *Berro et al. (2010); Aroush et al. (2017)*. Just as  
450 *Michalski and Carlsson (2011)*, our model predicts that the network's width remains constant along  
451 the length, which we also observed. *In vivo*, this property of the lamellipodial networks is most  
452 clearly apparent in keratocytes' lamellipodial fragments (*Ofer et al., 2011*). Actin comet tails of  
453 intracellular pathogens also sometimes appear to have a constant width (*Akin and Mullins, 2008*),  
454 while under other conditions the tails taper as they decay (*Carlier et al., 1997*).

455  
456 Previous modeling showed that the length of the treadmilling network is proportional to the  
457 polymerization velocity, is inversely proportional to the ADF/Cofilin density, and scales linearly  
458 with actin concentration (*Michalski and Carlsson, 2010*). Fitting our theoretical predictions to our  
459 data agrees with these previous predictions, except demonstrating that the network length is  
460 proportional to the square of the actin filament density at the leading edge. The reason for the  
461 difference, most likely, is that in *Michalski and Carlsson (2010)*, the network node breaking rate  
462 was proportional to the ADF/Cofilin density, and the node density scaled with the actin density. We  
463 suggest, similarly, that the network node (effectively, cross-linking and entanglement) density does  
464 scale with the actin density; however, the breaking (debranching and severing) rate is proportional  
465 to the ratio of the ADF/Cofilin to actin density, which is effectively the length density of ADF/Cofilin  
466 along actin filaments. Then, the ratio of the node density to the breaking rate per node, proportional  
467 to the square of the actin density divided by the ADF/Cofilin density, determines the network length.

468  
469 Addition of ADF/Cofilin was shown to shorten *Listeria* actin tails (*Carlier et al., 1997; Rosenblatt*  
470 *et al., 1997*); proportionality of the *Listeria* actin tails' lengths to the polymerization rate at the  
471 leading edge was demonstrated in *Theriot et al. (1992)*, and proportionality of the lamellipodial  
472 length in motile keratocytes' fragments to the actin growth rate at the leading edge was reported in



473 **Ofer et al. (2011)**. Interestingly, network length as a function of width was predicted to be linearly  
 474 increasing and then saturating, but saturation happens when the width is on the order of 20 mesh  
 475 sizes, on the micron scale (**Michalski and Carlsson, 2011**), and so this is unrelated to the effect that  
 476 we report in this study.

477 **Novelty of our findings and relevance to *in vivo* networks**

We established a simple formula that allows estimating the network length,  $L$ , as a function of a  
 wide range of geometric and biochemical parameters: Actin filament density at the leading edge,  
 $A_0$ , speed of actin growth at the leading edge,  $V$ , width of the network,  $W$ , and ADF/Cofilin density  
 in the solute,  $C_0$  (**Figure 5**):

$$L = k_1 \frac{A_0^2 V}{C_B}, \quad C_B = k_2 \frac{r_B A_0 C_0 L}{V} \times \frac{1}{1 + \frac{r_B A_0 W L}{D}},$$

478 Here  $C_B$  is the density of ADF/Cofilin bound to the network,  $D$  is the ADF/Cofilin diffusion coefficient  
 479 in the solute,  $r_B$  is the ADF/Cofilin binding coefficient,  $k_1 \approx 1s/\mu M$  is a parameter determining the  
 480 magnitude of the effective debranching severing rate, and  $k_2 = 1/2$  is a non-dimensional parameter.

481  
 482 One consequence of these results is that there are different ways for a cell to achieve the same  
 483 network length. For examples, if the actin density drops and hence the network becomes shorter,  
 484 there are two ways to re-establish the original network length (**Figure 5C-F**): Either the ADF/Cofilin  
 485 concentration has to be decreased, or the network has to become wider. In both cases the proce-  
 486 dure is as follows (compare arrows in **Figure 5E-F**): 1. The drop in actin density leads to a new,  
 487 shorter equilibrium length, 2. Through intersection with the constant-network length-level curves  
 488 an alternative parameter combination can be identified, which gives the original network length.  
 489 3. This gives the new (lower) ADF/Cofilin concentration in solution or new (higher) network width  
 490 necessary to maintain the original network length. This dynamic equilibrium underlies the network's  
 491 ability to adapt to external changes. Indeed, cycles between low and high loads generate branched  
 492 actin networks with different densities (**Bieling et al., 2016**). Our model explains how the system will  
 493 respond to adjust its dimension according to these changes. Similarly, membrane tension affects  
 494 the lamellipodium's actin filament density (**Mueller et al., 2017**). The dynamic equilibrium model  
 495 predicts how tension sensing will be counterbalanced to preserve the dimension of the growing  
 496 network.

497  
 498 We found that diffusion of ADF/Cofilin in the solution and binding to the growing actin network  
 499 can locally deplete the cytoplasmic ADF/Cofilin, which makes wider and denser actin networks  
 500 grow longer (**Figure 5D**). Quantitatively, whether the depletion is significant or not, is determined by  
 501 the magnitude of the non-dimensional quantity  $\frac{r_B A W L}{D}$ : if this factor is smaller than 1 (e.g. when  
 502 the network width and length are small enough), there is no significant depletion; otherwise, there is.

503  
 Using  $r_B \approx 0.01/(s \mu M)$  (**Tania et al., 2013**), we estimated that  $r_B A \approx 1/s$  (F-actin density is  
 $\approx 100 \mu M$  for observed branched networks, and so we use this parameter for all estimates), and  $D \approx$   
 $10 \mu m^2/s$  (**Tania et al., 2013**). Thus, for actin tails propelling intracellular pathogens and organelles,  
 for which  $W \approx 1 \mu m$  and  $L \approx 3 \mu m$ , we have:  $\frac{r_B A W L}{D} \approx 0.3$ , and the depletion of ADF/Cofilin is present  
 but moderate. In this case, the length of the tails can be estimated by the simple formula:

$$L \approx V \sqrt{\frac{k_1 A}{k_2 r_B C}} \approx 0.1 \mu m/s \times \sqrt{\frac{1s/\mu M \times 100 \mu M}{0.5 \times 0.008/(s \mu M) \times 20 \mu M}} \approx 3.5 \mu m,$$

504 as observed. We used  $V \approx 0.1 \mu m/s$  (**Theriot et al., 1992**) and assumed that the ADF/Cofilin concen-  
 505 tration in most of animal cells is on the order of  $20 \mu M$  (**Pollard et al., 2000**).

506

The diffusion-limited depletion of ADF/Cofilin is also relevant for very large cells, i.e. oocytes, muscle cells, nerve cells, megakaryocytes, with size on the order of hundreds of microns. At such size scale, the ADF/Cofilin diffusion time is on the order of minutes to many minutes, comparable to the characteristic time of the network treadmill. In these cases, assuming the characteristic dimensions of the flat Arp2/3-controlled networks,  $W \approx 10\mu m$  and  $L$  on the order of  $10\mu m$ , we have  $\frac{r_B A W L}{D C} \sim 10$ , and there is sizable depletion effect for ADF/Cofilin. In this case, we predict that  $C_B \approx k_2 \frac{D C}{V W}$  and so we predict that:

$$L \approx \frac{k_1 A^2 V^2 W}{k_2 D C} \approx 0.1 s / \mu M \frac{(100 \mu M)^2 \times (0.1 \mu m / s)^2 \times 10 \mu m}{(10 \mu m^2 / s) \times 20 \mu M} \approx 10 \mu m$$

507 which is a reasonable estimate.

508

We can also use our formulas to estimate the lamellipodial length in usual animal motile cells of intermediate size, like keratocytes and fibroblasts. In those cases, as the characteristic cell size is on the order of tens of microns, the characteristic diffusion time for ADF/Cofilin molecules is tens of seconds, less than or equal to the characteristic time of the network treadmill, so the *local* ADF/Cofilin depletion has a small effect. However, the lamellipodial actin represents a significant fraction of the total cell actin (**Barnhart et al., 2011**; **Ofer et al., 2011**), and so a significant fraction of all ADF/Cofilin is bound to the lamellipodial actin filaments. Thus, the *global* ADF/Cofilin depletion is of a major importance: our estimates of the binding and unbinding rates suggest that majority of ADF/Cofilin molecules would be bound to the lamellipodial actin. Then, assuming that the ADF/Cofilin concentration is on the order of  $20\mu M$  (**Pollard et al., 2000**) and taking into account characteristic volumes of the whole cell and of its lamellipodial part, we estimate that the bound ADF/Cofilin in the lamellipodial network has concentration on the order of  $C_B \approx 100\mu M$ . Then, the lamellipodial length

$$L \approx k_1 \frac{A^2 V}{C_B} \approx 1 s / \mu M \frac{(100 \mu M)^2 \times 0.1 \mu m / s}{100 \mu M} \approx 10 \mu m,$$

509 which is the order of magnitude found in experiments.

510

511 The clear *in vivo* relevance of the branched network steering is illustrated by recent observations  
512 that flat Arp2/3-governed sheets of branched actin regulate pathfinding of cells in 3D ECM (**Fritz-  
513 Laylin et al., 2017**). The question of how motile cells turn is attracting growing attention. A  
514 number of turning mechanisms were elucidated. As expected, chemotaxis-related biochemical  
515 pathways upstream of the actin network mechanics can regulate lamellipodial steering (**Yang et al.,  
516 2016**). However, mechanics, architecture and turnover of the network at the leading edge can  
517 lead to steering even in the absence of the upstream control. Examples of such mechanisms  
518 include Rac-Arpin nonlinear feedbacks regulating of the Arp2/3-branching activity (**Dang et al.,  
519 2013**), spatially graded thymosin  $\beta$ -4 mediated control of the lamellipodial turning (**Roy et al., 2001**)  
520 and monomer-diffusion mediated steering of heterogeneous actin networks (**Boujemaa-Paterski  
521 et al., 2017**). Steering of intracellular pathogens by curving their actin tails depends on harnessing  
522 viscoelastic deformations of the actin tails and polymerization forces on the curved pathogen  
523 surface to generate actin growth asymmetries (**Lacayo et al., 2012**). Motile cell turning can also  
524 rely on alternating types of actin networks (**Diz-Muñoz et al., 2016**) and on crosstalk between actin  
525 and microtubule dynamics (**Buck and Zheng, 2002**). Lastly, cells also can steer from the rear of the  
526 networks, by actin-myosin contraction asymmetry mechanism (**Nickaen et al., 2017**). Our findings  
527 add important additional control mechanism of tuning curvatures of the heterogeneous networks  
528 by ADF/Cofilin-mediated changes to network elasticity.

529 Model limitations and outstanding questions

530 Our experiments and modeling do not address the microscopic mechanism for the biological  
531 function of ADF/Cofilin, which is still debated. Our model is not explicitly microscopic and does

532 not distinguish between ADF/Cofilin-mediated severing, acceleration of disassembly at filament  
533 ends and debranching (*Chan et al., 2009*) (reviewed in *Blanchoin et al. (2014)*). Similarly, the model  
534 took into account neither ATP hydrolysis on actin subunits and preferential binding of ADF/Cofilin  
535 to ADP-actin (*Blanchoin and Pollard, 1999*), nor cooperativity of ADF/Cofilin binding (*Hayakawa*  
536 *et al., 2014*), nor ADF/Cofilin-induced structural change and destabilization of filaments (*Pfaendtner*  
537 *et al., 2010; Suarez et al., 2011; Wioland et al., 2017*). Due to technical limitations we did not  
538 explore very high ADF/Cofilin concentrations, at which over-decoration by ADF/Cofilin can lead to  
539 filament stabilization (*Andrianantoandro and Pollard, 2006*), and rate of debranching can become  
540 a nonlinear function of ADF/Cofilin concentration *Chan et al. (2009)*. Thus, we observed neither  
541 non-monotonic dependence of the severing activity on ADF/Cofilin concentration (*Andrianantoan-*  
542 *dro and Pollard, 2006; Pavlov et al., 2007*), nor independent of the lengths of *Listeria* actin comet  
543 tails on high ADF/Cofilin concentrations (*Rosenblatt et al., 1997*). Even though our model did not  
544 account for all this microscopic complexity, the model predictions are remarkably efficient, pointing  
545 out two important factors: Hydrolysis is fast enough so that only a micron- or sub-micron-size  
546 region near the very leading edge is affected by the hydrolysis state of the actin network, which  
547 is negligible when we deal with networks longer than a few microns. Also, as we note above, on  
548 the more macroscopic scale of the whole network, the microscopic complexity can be effectively  
549 combined into one overall disassembly rate.

550  
551 We also did not address the emerging molecular complexity of the disassembly process: *in vivo*,  
552 ADF/Cofilin often acts in synergy with the ADF cofactor actin-interacting protein 1 (AIP1), twinfilin,  
553 coronin and Srv2/adenylyl cyclase-associated protein (*Kueh et al., 2008; Johnston et al., 2015*). Thus,  
554 our modeling and experiments are not applicable to actin patches in yeast, which are so small  
555 (micron scale) and have such a rapid dynamics (on the order of seconds) (*Berro et al., 2010*) that  
556 some fast microscopic mechanisms employing additional molecular machinery, not accounted  
557 for in our study (see below) are likely involved. In addition, there are ADF/Cofilin-independent  
558 disassembly mechanisms, i.e. myosin-powered grinding of the actin network at the cell rear (*Wilson*  
559 *et al., 2010*). This synergy, added to complex nonlinear feedbacks between the branching, assembly  
560 and disassembly processes (*Tania et al., 2013*) and complex transport and partitioning of actin  
561 monomers and filaments in the cell (*Vitriol et al., 2015; Aroush et al., 2017*) cause ADF/Cofilin to  
562 affect not only the disassembly, but also polymerization rate and network density. For example,  
563 higher ADF/Cofilin concentration can accelerate growth speed (*Aizawa et al., 1996; Carlier et al.,*  
564 *1997*). In the future, the *in vitro* and *in silico* studies will have to address this systems-level actin  
565 network dynamics. Last, but not least, cell actin networks integrate architectures other than  
566 Arp2/3-controlled branched lamellipodia and comet tails, and there is a delicate, incompletely  
567 understood dynamic balance between branched, bundled and other networks (*Blanchoin et al.,*  
568 *2014*). Dependence of the disassembly on network architecture was recently discovered (*Gressin*  
569 *et al., 2015*). Future models and experiments will have to investigate quantitative rules of the  
570 integrated global actin network dynamics.

## 571 Conclusion

572 Our study leads to the important general conclusion that the cell is able to control the dynamic actin  
573 network length by adjusting either geometric, structural, or biochemical parameters, as needed.  
574 For example, if the network's width is dictated by the environment around the cell, then network's  
575 length can be regulated by tuning ADF/Cofilin concentration (*Figure 5C-F*). On the other hand, if  
576 the ADF/Cofilin concentration has to be tuned for timely disassembly of other actin structures,  
577 then the branched network's density or width can be changed in order to achieve necessary length  
578 (*Figure 5C-F*). In other words, there are multiple ways to set the dynamic balance of the biochemical  
579 and transport pathways regulating the global actin treadmill. This gives the cell a sufficient flexibility  
580 in the control of the cytoskeletal geometry, without compromising requirements for mechanical  
581 and biochemical parameters to control multiple cytoskeletal functions.

## 582 **Methods and Materials**

### 583 **Protein production and labeling**

584 Actin was purified from rabbit skeletal-muscle acetone powder (*Spudich and Watt, 1971*). Actin was  
585 labeled on lysines with Alexa-568 (*Isambert et al., 1995*). Labeling was done on lysines by incubating  
586 actin filaments with Alexa-568 succinimidyl ester (Molecular Probes). All experiments were carried  
587 out with 5% labeled actin. The Arp2/3 complex was purified from bovine thymus (*Egile et al., 1999*).  
588 GST-pWA is expressed in Rosettas 2 (DE3) pLysS and purified according to *Boujemaâ-Paterski et al.*  
589 (*2017*). Human profilin is expressed in BL21 DE3 pLys S *Escherichia coli* cells and purified according  
590 to *Almo et al. (1994)*. Mouse capping protein is purified according to *Falck et al. (2004)*.

### 591 **Laser patterning**

592 20x20 mm<sup>2</sup> coverslips and cover glasses (Agar Scientific) were extensively cleaned, oxidized with  
593 oxygen plasma (3 mn at 30 W, Harrick Plasma, Ithaca, NY, USA) and incubated with 1 mg ml<sup>-1</sup>  
594 of Silane-PEG overnight. Patterns of the desired density and area were printed on Silane-PEG-  
595 coated surfaces using a pulsed, passively Q-switched, laser (STV-E, TeamPhotonics) that delivers  
596 300 ps pulses at 355 nm. The laser power is controlled with a polarizer (iLasPulse device, Roper  
597 Scientific). Following laser patterning, patterned coverslips were coated with a solution of NPF at  
598 a concentration of 500 to 1000 nM for 15 min. The excess of NPFs was washed out with G-buffer  
599 (5 mM Tris-HCl [pH 8.0], 0.2 mM ATP, 0.1 mM CaCl<sub>2</sub> and 0.5 mM dithiothreitol (DTT)), and the surface  
600 was carefully dried.

### 601 **Reconstituted LMs**

602 Assembly of reconstituted LMs was initiated in polymerization chambers of 20x20 mm<sup>2</sup>x4.5 µm  
603 height by addition of the actin polymerization mix contained 6 µM actin monomers (containing  
604 3% Alexa568-labeled actin), 18 µM profilin, 120 nM Arp2/3, 25 nM CP, in X buffer (10 mM HEPES  
605 [pH 7], 0.1 M KCl, 1 mM MgCl<sub>2</sub>, 1 mM ATP, and 0.1 mM CaCl<sub>2</sub>) and was supplemented with 1% BSA,  
606 0.2% methylcellulose, 3 mM DTT, 0.13 mM 1,4-diazabicyclo[2.2.2]octane (DABCO), 1.8 mM ATP  
607 (*Boujemaâ-Paterski et al., 2017*). When needed, the polymerization mix also included yeast cofilin  
608 purified according to *Suarez et al. (2011)* at a concentration of 125, 250, or 500 nM. We normal-  
609 ized the actin network fluorescence between assays using 0.2 µm TetraSpeck fluorescent beads  
610 (Molecular Probes).

### 611 **Image acquisition**

612 Image acquisition was performed using an upright Axioimager M2 Zeiss microscope equipped with  
613 an EC Plan-Neofluar dry objective (x20, NA 0.75), a computer controlled fluorescence microscope  
614 light source X-Cite 120PC Q (Lumen Dynamics), a motorized XY stage (Marzhauser) and an ORCA-  
615 ER camera (Hamamatsu). The station was driven by MetaMorph software (Universal Imaging  
616 Corporation). The growth rates were calculated using ImageJ software.

### 617 **Mathematical Modeling**

618 Details about the mathematical modeling, analysis and simulation can be found in the Appendix.

### 619 **Acknowledgments**

620 This work was supported by grants from European Research council (741773 (AAA)) awarded to  
621 L.B., Agence Nationale de la recherche (MaxForce, ANR-14-CE11) awarded to L.B. and M.T.. A.I. was  
622 supported by a fellowship from Université de Grenoble Alpes. A.M. and A.M. are supported by US  
623 Army Research Office grant W911NF-17-1-0417.

## References

- 624  
625 **Achard V**, Martiel JL, Michelot A, Guérin C, Reymann AC, Blanchoin L, Boujemaa-Paterski R. A 'primer'-based  
626 mechanism underlies branched actin filament network formation and motility. *Current Biology*. 2010;  
627 20(5):423–428.
- 628 **Aizawa H**, Sutoh K, Yahara I. Overexpression of cofilin stimulates bundling of actin filaments, membrane ruffling,  
629 and cell movement in Dictyostelium. *Journal of Cell Biology*. 1996; 132(3):335–344.
- 630 **Akin O**, Mullins RD. Capping protein increases the rate of actin-based motility by promoting filament nucleation  
631 by the Arp2/3 complex. *Cell*. 2008; 133(5):841–851.
- 632 **Almo S**, Pollard T, Way M, Lattman E. Purification, characterization and crystallization of Acanthamoeba profilin  
633 expressed in Escherichia coli. *Journal of Molecular Biology*. 1994; 236(3):950–952.
- 634 **Amberg D**, Leadsham JE, Kotiadis V, Gourlay CW. Cellular ageing and the actin cytoskeleton. In: *Aging Research*  
635 *in Yeast* Springer; 2011.p. 331–352.
- 636 **Andrianantoandro E**, Pollard TD. Mechanism of actin filament turnover by severing and nucleation at different  
637 concentrations of ADF/cofilin. *Molecular Cell*. 2006; 24(1):13–23.
- 638 **Aroush DRB**, Ofer N, Abu-Shah E, Allard J, Krichevsky O, Mogilner A, Keren K. Actin turnover in lamellipodial  
639 fragments. *Current Biology*. 2017; 27(19):2963–2973.
- 640 **Bamburg JR**. Proteins of the ADF/cofilin family: essential regulators of actin dynamics. *Annual Review of Cell*  
641 *and Developmental Biology*. 1999; 15(1):185–230.
- 642 **Barnhart EL**, Lee KC, Keren K, Mogilner A, Theriot JA. An adhesion-dependent switch between mechanisms that  
643 determine motile cell shape. *PLoS Biology*. 2011; 9(5):e1001059.
- 644 **Bernheim-Groswasser A**, Wiesner S, Golsteyn RM, Carlier MF, Sykes C. The dynamics of actin-based motility  
645 depend on surface parameters. *Nature*. 2002; 417(6886):308.
- 646 **Berro J**, Sirotkin V, Pollard TD. Mathematical modeling of endocytic actin patch kinetics in fission yeast:  
647 disassembly requires release of actin filament fragments. *Molecular Biology of the Cell*. 2010; 21(16):2905–  
648 2915.
- 649 **Bieling P**, Weichsel J, McGorty R, Jreij P, Huang B, Fletcher DA, Mullins RD, et al. Force feedback controls motor  
650 activity and mechanical properties of self-assembling branched actin networks. *Cell*. 2016; 164(1-2):115–127.
- 651 **Blanchoin L**, Boujemaa-Paterski R, Sykes C, Plastino J. Actin dynamics, architecture, and mechanics in cell  
652 motility. *Physiological Reviews*. 2014; 94(1):235–263.
- 653 **Blanchoin L**, Pollard TD. Mechanism of interaction of Acanthamoeba actophorin (ADF/Cofilin) with actin  
654 filaments. *Journal of Biological Chemistry*. 1999; 274(22):15538–15546.
- 655 **Blanchoin L**, Pollard TD, Mullins RD. Interactions of ADF/cofilin, Arp2/3 complex, capping protein and profilin in  
656 remodeling of branched actin filament networks. *Current Biology*. 2000; 10(20):1273–1282.
- 657 **Borisy GG**, Svitkina TM. Actin machinery: pushing the envelope. *Current Opinion in Cell Biology*. 2000;  
658 12(1):104–112.
- 659 **Boujemaa-Paterski R**, Suarez C, Klar T, Zhu J, Guérin C, Mogilner A, Théry M, Blanchoin L. Network heterogeneity  
660 regulates steering in actin-based motility. *Nature Communications*. 2017; 8(1):655.
- 661 **Buck KB**, Zheng JQ. Growth cone turning induced by direct local modification of microtubule dynamics. *Journal*  
662 *of Neuroscience*. 2002; 22(21):9358–9367.
- 663 **Carlier MF**, Laurent V, Santolini J, Melki R, Didry D, Xia GX, Hong Y, Chua NH, Pantaloni D. Actin depolymerizing  
664 factor (ADF/cofilin) enhances the rate of filament turnover: implication in actin-based motility. *Journal of Cell*  
665 *Biology*. 1997; 136(6):1307–1322.
- 666 **Carlier MF**, Shekhar S. Global treadmill coordinates actin turnover and controls the size of actin networks.  
667 *Nature Reviews Molecular Cell Biology*. 2017; 18(6):389.
- 668 **Carlsson A**. Disassembly of actin networks by filament severing. *New Journal of Physics*. 2007; 9(11):418.
- 669 **Chan C**, Beltzner CC, Pollard TD. Cofilin dissociates Arp2/3 complex and branches from actin filaments. *Current*  
670 *Biology*. 2009; 19(7):537–545.

- 671 **Chin SM**, Jansen S, Goode BL. TIRF microscopy analysis of human Cof1, Cof2, and ADF effects on actin filament  
672 severing and turnover. *Journal of Molecular Biology*. 2016; 428(8):1604–1616.
- 673 **Dang I**, Gorelik R, Sousa-Blin C, Derivery E, Guérin C, Linkner J, Nemethova M, Dumortier JG, Giger FA, Chipysheva  
674 TA, et al. Inhibitory signalling to the Arp2/3 complex steers cell migration. *Nature*. 2013; 503(7475):281.
- 675 **Dayel MJ**, Akin O, Landeryou M, Risca V, Mogilner A, Mullins RD. In silico reconstitution of actin-based symmetry  
676 breaking and motility. *PLoS Biology*. 2009; 7(9):e1000201.
- 677 **Dimchev G**, Steffen A, Kage F, Dimchev V, Pernier J, Carlier MF, Rottner K. Efficiency of lamellipodia protrusion is  
678 determined by the extent of cytosolic actin assembly. *Molecular Biology of the Cell*. 2017; 28(10):1311–1325.
- 679 **Diz-Muñoz A**, Romanczuk P, Yu W, Bergert M, Ivanovitch K, Salbreux G, Heisenberg CP, Paluch EK. Steering cell  
680 migration by alternating blebs and actin-rich protrusions. *BMC Biology*. 2016; 14(1):74.
- 681 **Egile C**, Loisel TP, Laurent V, Li R, Pantaloni D, Sansonetti PJ, Carlier MF. Activation of the CDC42 effector N-WASP  
682 by the *Shigella flexneri* IcsA protein promotes actin nucleation by Arp2/3 complex and bacterial actin-based  
683 motility. *Journal of Cell Biology*. 1999; 146(6):1319–1332.
- 684 **Falck S**, Paavilainen VO, Wear MA, Grossmann JG, Cooper JA, Lappalainen P. Biological role and structural  
685 mechanism of twinfilin–capping protein interaction. *The EMBO journal*. 2004; 23(15):3010–3019.
- 686 **Frischknecht F**, Moreau V, Röttger S, Gonfloni S, Reckmann I, Superti-Furga G, Way M. Actin-based motility of  
687 vaccinia virus mimics receptor tyrosine kinase signalling. *Nature*. 1999; 401(6756):926.
- 688 **Fritz-Laylin LK**, Riel-Mehan M, Chen BC, Lord SJ, Goddard TD, Ferrin TE, Nicholson-Dykstra SM, Higgs H, Johnson  
689 GT, Betzig E, et al. Actin-based protrusions of migrating neutrophils are intrinsically lamellar and facilitate  
690 direction changes. *eLife*. 2017; 6.
- 691 **Gardel M**, Shin J, MacKintosh F, Mahadevan L, Matsudaira P, Weitz D. Elastic behavior of cross-linked and  
692 bundled actin networks. *Science*. 2004; 304(5675):1301–1305.
- 693 **Gressin L**, Guillotin A, Guérin C, Blanchoin L, Michelot A. Architecture dependence of actin filament network  
694 disassembly. *Current Biology*. 2015; 25(11):1437–1447.
- 695 **Hayakawa K**, Sakakibara S, Sokabe M, Tatsumi H. Single-molecule imaging and kinetic analysis of cooperative  
696 cofilin–actin filament interactions. *Proceedings of the National Academy of Sciences*. 2014; 111(27):9810–9815.
- 697 **Hopmann R**, Miller KG. A balance of capping protein and profilin functions is required to regulate actin  
698 polymerization in *Drosophila* bristle. *Molecular Biology of the Cell*. 2003; 14(1):118–128.
- 699 **Isambert H**, Venier P, Maggs AC, Fattoum A, Kassab R, Pantaloni D, Carlier MF. Flexibility of actin filaments  
700 derived from thermal fluctuations. Effect of bound nucleotide, phalloidin, and muscle regulatory proteins.  
701 *Journal of Biological Chemistry*. 1995; 270(19):11437–11444.
- 702 **Johnston AB**, Collins A, Goode BL. High-speed depolymerization at actin filament ends jointly catalysed by  
703 Twinfilin and Srv2/CAP. *Nature Cell Biology*. 2015; 17(11):1504.
- 704 **Kawska A**, Carvalho K, Manzi J, Boujemaa-Paterski R, Blanchoin L, Martiel JL, Sykes C. How actin network  
705 dynamics control the onset of actin-based motility. *Proceedings of the National Academy of Sciences*. 2012;  
706 109(36):14440–14445.
- 707 **Koestler SA**, Steffen A, Nemethova M, Winterhoff M, Luo N, Holleboom JM, Krupp J, Jacob S, Vinzenz M, Schur F,  
708 et al. Arp2/3 complex is essential for actin network treadmilling as well as for targeting of capping protein  
709 and cofilin. *Molecular Biology of the Cell*. 2013; 24(18):2861–2875.
- 710 **Krause M**, Gautreau A. Steering cell migration: lamellipodium dynamics and the regulation of directional  
711 persistence. *Nature Reviews Molecular Cell biology*. 2014; 15(9):577.
- 712 **Kueh HY**, Charras GT, Mitchison TJ, Brieher WM. Actin disassembly by cofilin, coronin, and Aip1 occurs in bursts  
713 and is inhibited by barbed-end cappers. *Journal of Cell Biology*. 2008; 182(2):341–353.
- 714 **Lacayo CI**, Soneral PA, Zhu J, Tsuchida MA, Footer MJ, Soo FS, Lu Y, Xia Y, Mogilner A, Theriot JA. Choosing  
715 orientation: influence of cargo geometry and ActA polarization on actin comet tails. *Molecular Biology of the  
716 Cell*. 2012; 23(4):614–629.
- 717 **Li P**, Bademosi AT, Luo J, Meunier FA. Actin Remodeling in Regulated Exocytosis: Toward a Mesoscopic View.  
718 *Trends in Cell Biology*. 2018; .

- 719 **Loisel TP**, Boujemaa R, Pantaloni D, Carlier MF. Reconstitution of actin-based motility of *Listeria* and *Shigella*  
720 using pure proteins. *Nature*. 1999; 401(6753):613.
- 721 **Michalski P**, Carlsson A. The effects of filament aging and annealing on a model lamellipodium undergoing  
722 disassembly by severing. *Physical Biology*. 2010; 7(2):026004.
- 723 **Michalski P**, Carlsson A. A model actin comet tail disassembling by severing. *Physical Biology*. 2011; 8(4):046003.
- 724 **Mueller J**, Szep G, Nemethova M, de Vries I, Lieber A, Winkler C, Kruse K, Small J, Schmeiser C, Keren K, et al.  
725 Load adaptation of lamellipodial actin networks. *Cell*. 2017; 171(1):188–200.
- 726 **Nickaen M**, Novak IL, Pulford S, Rumack A, Brandon J, Slepchenko BM, Mogilner A. A free-boundary model of  
727 a motile cell explains turning behavior. *PLoS Computational Biology*. 2017; 13(11):e1005862.
- 728 **Novak IL**, Kraikivski, Pavel S, M B. Diffusion in cytoplasm: Effects of excluded volume due to internal membranes  
729 and cytoskeletal structures. *Biophysical Journal*. 2009; .
- 730 **Ofer N**, Mogilner A, Keren K. Actin disassembly clock determines shape and speed of lamellipodial fragments.  
731 *Proceedings of the National Academy of Sciences*. 2011; 108(51):20394–20399.
- 732 **Pavlov D**, Muhlrade A, Cooper J, Wear M, Reisler E. Actin filament severing by cofilin. *Journal of Molecular Biology*.  
733 2007; 365(5):1350–1358.
- 734 **Pfaendtner J**, Enrique M, Voth GA. Actin filament remodeling by actin depolymerization factor/cofilin. *Proceed-*  
735 *ings of the National Academy of Sciences*. 2010; 107(16):7299–7304.
- 736 **Pollard TD**, Blanchoin L, Mullins RD. Molecular mechanisms controlling actin filament dynamics in nonmuscle  
737 cells. *Annual Review of Biophysics and Biomolecular Structure*. 2000; 29(1):545–576.
- 738 **Reed SO**, Lamason R, Risca V, Abernathy E, Welch M. *Rickettsia* actin-based motility occurs in distinct phases  
739 mediated by different actin nucleators. *Current Biology*. 2014; 24(1):98–103.
- 740 **Reymann AC**, Suarez C, Guérin C, Martiel JL, Staiger CJ, Blanchoin L, Boujemaa-Paterski R. Turnover of branched  
741 actin filament networks by stochastic fragmentation with ADF/cofilin. *Molecular Biology of the Cell*. 2011;  
742 22(14):2541–2550.
- 743 **Roland J**, Berro J, Michelot A, Blanchoin L, Martiel JL. Stochastic severing of actin filaments by actin depoly-  
744 merizing factor/cofilin controls the emergence of a steady dynamical regime. *Biophysical Journal*. 2008;  
745 94(6):2082–2094.
- 746 **Rosenblatt J**, Agnew BJ, Abe H, Bamburg JR, Mitchison TJ. *Xenopus* actin depolymerizing factor/cofilin (XAC) is  
747 responsible for the turnover of actin filaments in *Listeria monocytogenes* tails. *Journal of Cell Biology*. 1997;  
748 136(6):1323–1332.
- 749 **Rottner K**, Schaks M. Assembling actin filaments for protrusion. *Current Opinion in Cell Biology*. 2019; 56:53–63.
- 750 **Rottner K**, Stradal TE. Actin dynamics and turnover in cell motility. *Current Opinion in Cell Biology*. 2011;  
751 23(5):569–578.
- 752 **Rotty JD**, Wu C, Bear JE. New insights into the regulation and cellular functions of the ARP2/3 complex. *Nature*  
753 *Reviews Molecular Cell Biology*. 2013; 14(1):7.
- 754 **Roy P**, Rajfur Z, Jones D, Marriott G, Loew L, Jacobson K. Local photorelease of caged thymosin  $\beta$ 4 in locomoting  
755 keratocytes causes cell turning. *Journal of Cell Biology*. 2001; 153(5):1035–1048.
- 756 **Spudich JA**, Watt S. The regulation of rabbit skeletal muscle contraction I. Biochemical studies of the interaction  
757 of the tropomyosin-troponin complex with actin and the proteolytic fragments of myosin. *Journal of Biological*  
758 *Chemistry*. 1971; 246(15):4866–4871.
- 759 **Stuhrmann B**, Huber F, Käs J. Robust organizational principles of protrusive biopolymer networks in migrating  
760 living cells. *PLoS One*. 2011; 6(1):e14471.
- 761 **Suarez C**, Roland J, Boujemaa-Paterski R, Kang H, McCullough BR, Reymann AC, Guérin C, Martiel JL, Enrique M,  
762 Blanchoin L. Cofilin tunes the nucleotide state of actin filaments and severs at bare and decorated segment  
763 boundaries. *Current Biology*. 2011; 21(10):862–868.
- 764 **Svitkina TM**, Borisy GG. Arp2/3 complex and actin depolymerizing factor/cofilin in dendritic organization and  
765 treadmilling of actin filament array in lamellipodia. *Journal of Cell Biology*. 1999; 145(5):1009–1026.

- 766 **Tania N**, Condeelis J, Edelstein-Keshet L. Modeling the synergy of cofilin and Arp2/3 in lamellipodial protrusive  
767 activity. *Biophysical Journal*. 2013; 105(9):1946–1955.
- 768 **Taunton J**, Rowning BA, Coughlin ML, Wu M, Moon RT, Mitchison TJ, Larabell CA. Actin-Dependent Propulsion of  
769 Endosomes and Lysosomes by Recruitment of N-Wasp. *Journal of Cell Biology*. 2000; 148(3):519–530.
- 770 **Theriot JA**, Mitchison TJ, Tilney LG, Portnoy DA. The rate of actin-based motility of intracellular *Listeria monocy-*  
771 *togenes* equals the rate of actin polymerization. *Nature*. 1992; 357(6375):257.
- 772 **Vargas P**, Maiuri P, Bretou M, Sáez PJ, Pierobon P, Maurin M, Chabaud M, Lankar D, Obino D, Terriac E, et al.  
773 Innate control of actin nucleation determines two distinct migration behaviours in dendritic cells. *Nature Cell*  
774 *Biology*. 2016; 18(1):43.
- 775 **Vitriol EA**, McMillen LM, Kapustina M, Gomez SM, Vavylonis D, Zheng JQ. Two functionally distinct sources of  
776 actin monomers supply the leading edge of lamellipodia. *Cell Reports*. 2015; 11(3):433–445.
- 777 **Wilson CA**, Tsuchida MA, Allen GM, Barnhart EL, Applegate KT, Yam PT, Ji L, Keren K, Danuser G, Theriot JA.  
778 Myosin II contributes to cell-scale actin network treadmilling through network disassembly. *Nature*. 2010;  
779 465(7296):373.
- 780 **Wioland H**, Guichard B, Senju Y, Myram S, Lappalainen P, Jégou A, Romet-Lemonne G. ADF/Cofilin accelerates  
781 actin dynamics by severing filaments and promoting their depolymerization at both ends. *Current Biology*.  
782 2017; 27(13):1956–1967.
- 783 **Yang HW**, Collins SR, Meyer T. Locally excitable Cdc42 signals steer cells during chemotaxis. *Nature Cell Biology*.  
784 2016; 18(2):191.



## 785 Appendix 1

### 786 Estimating effective diffusion coefficient of ADF/Cofilin in the branched 787 actin network.

788 Here, we test the hypothesis whether wider networks are less affected by ADF/Cofilin  
789 because dense actin networks hinder diffusion, and this does not allow enough time for  
790 ADF/Cofilin to access the middle of a network. To do so, we used the theory developed  
791 in **Novak et al. (2009)**, which examines how the presence of obstacles affects the effective  
792 diffusion constant of a particle. According to **Novak et al. (2009)**, the ratio between the  
793 ADF/Cofilin diffusion constant in the cytosol,  $D$ , and the effective diffusion constant of  
794 ADF/Cofilin in the branched actin network,  $D_{\text{eff}}$ , can be estimated as:

$$795 \frac{D_{\text{eff}}}{D} = \frac{(1 - \phi/\phi_c)^\mu}{1 - \phi}.$$

796 In the theory derived in **Novak et al. (2009)**, the actin network is represented as a collection  
797 of long cylindrical obstacles / filaments, through which ADF/Cofilin molecules diffuse. This  
798 theory estimates the ratio of the diffusion coefficients as the function of three parameters:  
799  $\phi$ ,  $\phi_c$  and  $\mu$ . Exponent  $\mu = 1.58$  was estimated in **Novak et al. (2009)** based on characteristic  
800 dimensions of the cylindrical obstacles. Parameter  $\phi$  reflects the effect of the actin volume  
801 fraction on diminishing the diffusion coefficient and is given as  $\phi = 1 - \exp(-V)$ , where  
802 parameter  $V$  depends on the sum of volumes of individual obstacles per unit volume, and is  
803 determined by the number of filaments per unit area,  $f$ , the average orientation angle of the  
804 filaments,  $\alpha = 35^\circ$ , and the radii of actin filaments,  $r_A = 3.5\text{nm}$ , and of ADF/Cofilin molecules,  
805  $r_C = 1.58\text{nm}$ , as follows:

$$806 V = \frac{f(r_A + r_C)^2 \pi}{\sin \alpha}. \quad (9)$$

807 Finally, parameter  $\phi_c = 0.942$  characterizes the critically dense network, which completely  
808 obstructs the diffusion. A conservative estimate can be made by assuming a dense actin  
809 network with  $f = 300/\mu\text{m}^2$ . This gives estimates of  $V = 0.042$  and  $D_{\text{eff}} = 0.97D$ . Thus, the  
810 effect of even a dense actin network on the ADF/Cofilin diffusion coefficient is but a few per  
811 cent and can be neglected.

### 816 Determining initial ADF/Cofilin binding rate

To determine the ADF/Cofilin binding rate (see Sec. Spatio-temporal ADF/Cofilin dynamics  
and its local depletion in the main text), we used the experimentally measured concentrations  
of ADF/Cofilin and actin. We focused on the changes of bound ADF/Cofilin concentration at  
the beginning the network growth, since in this early stage we can neglect both ADF/Cofilin  
unbinding and depletion of free ADF/Cofilin. This means that we can assume that:

$$\partial_t C_B + V \partial_y C_B \approx b(A, C_0),$$

where  $b(A, C_0)$  is the binding rate we would like to determine. Since we know the network  
growth speed, we can measure the increase of bound ADF/Cofilin  $\dot{C}_B$  in moving patches  
of actin, i.e. we can directly measure  $b(A, C_0)$ . First, we examined networks with similar  
actin densities  $A$ , and found a strong correlation ( $R = 0.69$ ,  $p < 10^{-3}$ ) between the binding  
rate  $\dot{C}_B$  and the concentration of the ADF/Cofilin in the solute  $C_0$  (App.Fig. 1A). Next, we  
examined networks in the experiments with similar solute ADF/Cofilin concentrations  $C_0$ ,  
but with varying actin densities  $A$ , and found a strong correlation between  $\dot{C}_B$  and the actin  
density  $A$  ( $R = 0.69$ ,  $p < 10^{-5}$ ) (App.Fig. 1B). Finally, we examined networks with varying

831

832

833

834

835

836

837

838

values of parameters  $C_0$  and  $A$ , and found that indeed the binding rate  $\dot{C}_B \propto AC_0$  ( $R = 0.51$ ,  $p < 10^{-5}$ , App.Fig. 1C), justifying the use of the proposed mathematical form for the binding rate  $b(A, C_0) = r_B AC_0$  at the beginning of the network growth. In the main text, we show, by comparison with the data, that in fact the form  $b(A, C_0) = r_B AC_F$ , i.e. the rate of binding being limited by the local, not initial, concentration of ADF/Cofilin in the solute,  $C_F$ , leads to the model predictions that fit the data very well.

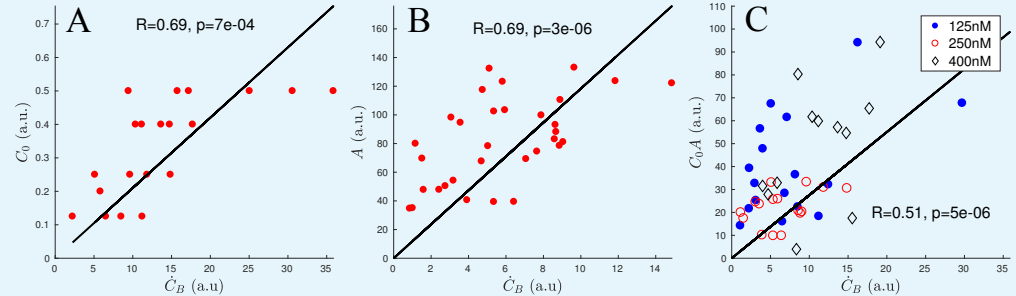

839

840

841

842

843

844

**Appendix 1 Figure 1. Scaling of ADF/Cofilin binding rate.** A: Correlation of  $\dot{C}_B$  and  $C_0$  using only networks with an actin density between 120 and 180 (a.u.). B: Correlation of  $\dot{C}_B$  and  $A$  using only networks with a ADF/Cofilin solute concentration between 200 and 250nM. C: Correlation of  $\dot{C}_B$  and  $C_0 A$  using networks of varying ADF/Cofilin solute concentration and actin density.

845

846

## Spatio-temporal ADF/Cofilin model: details and simulation

### Model.

In this section we provide details for the model of the ADF/Cofilin dynamics. All model parameters are gathered in App.Tab. 1 below. We simulate the model in 2D with  $(x, y) \in [-B/2, B/2] \times [-B/2, B/2] \subset \mathbb{R}^2$ , where  $B > 0$  is the size of the square-shaped domain. The density of free ADF/Cofilin molecules diffusing in the solute is denoted by  $C_F(x, y, t)$ , those bound to the actin network by  $C_B(x, y, t)$ . In the simulations, an actin network of width  $W$  and length  $L(t) = tV$  is positioned at  $\mathcal{N} = [-W/2, W/2] \times [0, L(t)]$ . The model consists of the following equations:

$$\partial_t C_B + V \partial_y C_B = r_B A C_F - r_U C_B, \quad (10)$$

$$\partial_t C_F = D \Delta C_F - r_B A C_F + r_U C_B, \quad (11)$$

with the initial conditions  $C_F(x, y, 0) = C_0$ ,  $C_B(x, y, 0) = 0$ , and the boundary conditions:

$$C_F(x, y, t) = C_0 \quad x = \pm B/2 \quad \text{or} \quad y = \pm B/2$$

$$C_B(x, 0, t) = 0.$$

In the experiment, networks grow in a large, several square millimeter sized chambers, so that the total amount of ADF/Cofilin is not limiting, and moreover, over the time of the experiment, about 60 minutes, diffusion is not fast enough to diminish the ADF/Cofilin concentration in the solute farther than a few hundred microns from the growing network (for relevant estimates, see [Boujema-Paterski et al. \(2017\)](#).) For this reason, we performed the simulations in the area 1 millimeter in size, smaller than the size of the whole experimental chamber, but large enough so that the concentration of free ADF/Cofilin at its boundary is almost identical to the initial ADF/Cofilin solute concentration. This justifies using Dirichlet boundary conditions also for  $C_F$ , rather than no flux boundary conditions. For the actin density, we assume  $A(x, y, t) \equiv 0$  whenever  $(x, y) \notin \mathcal{N}$ . Within the network, we use two scenarios: The actin density is constant, or the actin density is a function of  $y$  only, i.e.  $A(x, y, t) = A(y)$ , where we use the measured actin density along the network, averaged over

870  
871  
872  
873  
874  
875  
876  
877  
878  
879  
880  
881  
882  
883  
884  
885  
886  
887  
888  
889  
890  
891  
892  
893  
894  
895  
896  
897  
898  
899  
900  
901  
902  
903  
904  
905  
906  
907  
908  
909  
910  
911  
912  
913  
914  
915  
916  
917  
918  
919

its width and fitted using a smoothing spline. The smoothing avoids potential numerical problems when solving partial differential equations due to the roughness of the measured data.

### Simulation.

Parameters are summarized in App.Tab. 1. To solve Eqs. (10),(11) numerically, we used a splitting scheme: At each timestep  $t_n$ , we first solved the equations

$$\begin{aligned}\partial_t C_B &= r_B A C_F - r_U C_B, \\ \partial_t C_F &= D \Delta C_F - r_B A C_F + r_U C_B,\end{aligned}$$

on the interval  $[t_n, t_n + \Delta t]$  using a Finite Element Method (FEM) as implemented by the parabolic solver of Matlab's PDE toolbox. Since large density gradients can be expected only near the network, we used a triangular FEM-mesh that is much finer on and near the network than far away from it. Overall, the number of mesh triangles was between 2000 and 5000 for each simulation. The mesh itself was time-independent, avoiding having to re-mesh at each time step. Next, we employed a forward-Euler finite-difference scheme for the transport term  $\partial_t C_B + V \partial_y C_B$ , with shifting the calculated values of  $C_B$  and subsequent interpolation onto the elements of the mesh.

## Stochastic fragmentation model: details and simulation

In our discrete network model, we describe the network as a collection of nodes and edges in 2D. Each edge represents an array of actin filaments, each node represents cross-linking or branching points. Our discrete network model follows ideas presented in *Carlsson (2007); Michalski and Carlsson (2010, 2011)*, however we allow our breakage rate to depend on local actin density and present a new analytical approximation (see Sec. Derivation of analytical model of network fragmentation). At its fully connected state each inner node is connected to four edges. We represent the whole network as a graph, i.e. for each node, we track the nodes to which this given node is connected to. During each time step, the discrete network model is updated in four steps:

1. *Remove individual nodes.* Given an actin density  $A$  for a given node (step 4 below), we determine a breakage rate per node and time  $P = \frac{p}{A^\alpha}$ , where parameter  $p$  is a constant. The node breakage follows a Poisson process with rate  $P$ , and we determine the probability of breakage at each time step as  $1 - e^{-P\Delta t}$ .
2. *Remove edges and network pieces.* There are two ways edges can be removed: Individually – this happens if both nodes an edge is connected to are removed. On the other hand, a larger network piece could become disconnected as a consequence of step 1. We considered network segments to be disconnected if they have no connection to the leading edge (i.e. there is no path of edges connecting the given piece to the leading edge) and assume disconnected network pieces diffuse away quickly.
3. *Grow network.* This step simply adds rows of nodes and edges at the leading edge proportional to the network growth speed  $V$ .
4. *Calculate local actin densities.* In our model, the local actin density depends on the number of edges present, not the number of nodes, i.e. if a node is removed within an otherwise fully connected patch, the actin density would not be affected. To calculate the local actin density at a node, we count the number of missing edges within a square patch around the node with a of  $r_{\text{nod}} = 2$  (in units of the edge length), i.e. we are considering the 24 nodes or 40 edges around the given node. Finally, the determined fraction of the unbroken edges was multiplied by the model parameter  $A_0$ , the initial actin density.

920  
921  
922  
923  
924  
925  
926  
927  
928  
929  
930  
931  
932  
933  
934  
935  
936  
937  
938  
  
939  
940  
941  
942  
943  
944  
945  
946  
947  
948  
  
949  
950  
951  
952  
953  
954  
955  
956  
957  
958  
959  
960  
961  
962  
963  
964  
965  
966

## Implementation and Parameters.

We performed numerical tests and found that as long as the node number along the leading edge,  $K$ , is larger than  $\approx 20$ , the equilibrium length is barely affected by the choice of  $K$  (as noted also in *Carlsson (2007)*). We therefore decided to use  $K = 30, 60$  and  $180$  for  $15\mu\text{m}$ ,  $30\mu\text{m}$  and  $90\mu\text{m}$  networks respectively. We used the time step of  $\Delta t = 1\text{min}$ . For *Figure 4D* we varied the initial actin density  $A_0$  and the exponent  $\alpha$ . For illustration purposes, we also changed the parameter  $p$  and used  $p = 0.25, 2.5, 25$  and  $250$  for  $\alpha = 0.5, 1, 1.5$  and  $2$  respectively (otherwise the obtained network lengths would differ by orders of magnitudes, making the visualization less clear). For the simulation in main *Figure 4B* we used  $\text{width} = 90\mu\text{m}$ ,  $\alpha = 2$ ,  $A_0 = 100\mu\text{M}$ ,  $p = 194\mu\text{M}^2/\text{min}$ ,  $V = 0.8\mu\text{m}/\text{min}$ , for the comparison shown for the network in *Figure 4E* we used  $\text{width} = 15\mu\text{m}$ ,  $\alpha = 2$ ,  $A_0 = 400\mu\text{M}$ ,  $p = 250\mu\text{M}^2/\text{min}$ ,  $V = 1.5\mu\text{m}/\text{min}$ .

We represented the network as an undirected graph using Matlab routines, allowing to quickly determine connected components, which can be a time-consuming step. Edges that are connected to only one node can be represented as a loop, i.e. we formally connect both edge ends to the same node. Finally, if a node has two or three edges that are connected to only this node, this can be accounted for by assigning a weight of two or three to that edge. This is necessary to keep edges unique in the graph-based description. For example, a weight of two means that this edge counts twice when determining actin densities.

## Derivation of analytical model of network fragmentation.

In this section we describe an analytical approximation of the network length and actin density along the network of the discrete network model of Sec. Stochastic fragmentation model: details and simulation. In the discrete network model, we describe the whole network as a collection of nodes and edges, representing branches and connecting actin filaments respectively. At its fully connected state each (inner) node is connected to four edges. Each node is being broken with a probability  $P$  per node and time, that will depend on local properties of the network. An edge (i.e. actin filament segment) is removed only if either both of the nodes it is connected to are broken, or, if it is removed as part of a larger patch that is being disconnected.

## Main Result

The analytical results can be summarized as follows: If the breakage rate per node is  $P = c \frac{C_B^\beta}{A^\alpha}$ , where  $C_B$  is the (constant) concentration of bound ADF/Cofilin in the network,  $A(y)$  is the actin density,  $V$  is the network growth speed and  $c$  is a dimensional constant proportionality coefficient, then the equilibrium network length is given by:

$$L = \frac{V A_0^\alpha}{c C_B^\beta} \int_0^1 \frac{(1-r^2)^\alpha}{(1-r) \left(1 + \frac{r}{(1-r)^2}\right)} dr.$$

Note that this integral is finite for any choice of  $\alpha$ . If  $A_0$  is the initial actin density, then the actin density along the network in equilibrium is given by

$$A(y) = A_0(1 - r(y)^2),$$

where  $r(y)$ , the fraction of broken nodes along the network, is the solution of the ordinary differential equation:

$$V r' = c \frac{C_B^\beta}{A_0^\alpha} \frac{1-r}{(1-r^2)^\alpha} \left(1 + \frac{r}{(1-r)^2}\right), \quad r(0) = 1.$$

967  
968  
969  
970  
971  
972  
973  
974  
975  
976  
977  
978  
979  
980  
981  
982  
983  
984  
985  
986  
987  
988  
989  
990  
991  
992  
993  
994  
995  
996  
997  
998  
999  
1000  
1001  
1002  
1003  
1004  
1005  
1006  
1007

## Derivation

Let  $N_0$  be the initial number of the network nodes per area,  $R$  - the number of the broken nodes per area, and  $E$  - the number of the network edges per area. If initially each node was connected to four edges, then  $E_0 = 2N_0$ . Two factors contribute to the edge removal:

- A The current connectedness of the network;
- B The number of nodes that are being removed locally.

A: In the absence of removal of larger pieces of the network, the deletion of a node will only affect edges that are connected to this very node, and only if those edges are unconnected at the other ends. The expected number of such edges for an unbroken node is:

$$\text{no. of edges per node} \times \text{prob. that the node at the other end is broken} = 4 \frac{R}{N_0}.$$

We model continuous densities  $R$  and  $E$  using the following equations:

$$\begin{aligned} \dot{R} &= P(N_0 - R) \left( 1 + \frac{R/N_0}{(1 - R/N_0)^2} \right), \\ \dot{E} &= -4 \frac{R}{N_0} \dot{R}. \end{aligned} \tag{12}$$

The second equation is simply stating that the rate of edge removal is equal to the rate of the node removal times the expected number of edges connected to the node being removed. In the first equation, expression  $P(N_0 - R)$  accounts for the node breakage with rate  $P$ . Factor  $\left( 1 + \frac{R/N_0}{(1 - R/N_0)^2} \right)$  in this equation accounts for the factor B: if the network connectedness is low, then per each removed node, more nodes could be removed. This factor is equal to 1 for very low density of broken nodes, and has to be an increasing function of the variable  $R/N_0$ . Rather than using theoretical arguments to try to find this function, we simply used a few tens of simulations of the discrete stochastic model to estimate numerically the average number of the nodes removed for each randomly removed node at any given density of the broken nodes. The function  $\left( 1 + \frac{R/N_0}{(1 - R/N_0)^2} \right)$  approximated the numerical data well for  $0 < R/N_0 < 0.7$ . For larger  $R/N_0$  the network is already largely falling apart. We found that using more complicated functions to approximate the behavior hardly affects the predictions of network length and density.

## Adding transport effects

We introduce the space and time dependent fraction of broken nodes  $r = R/N_0$  and the rescaled actin density  $a = A/A_0$ , and note that values of  $A$  and  $E$  are connected by the relation  $A = E/\sqrt{N_0}$ , where  $1/\sqrt{N_0}$  is the approximate edge length in 2D. Since both edges and nodes are being transported within the network at speed  $V$ , we can replace Eqs. (12) by the following PDE system for densities  $a(y, t)$  and  $r(y, t)$ , where  $y$  is the distance along the network:

$$\begin{aligned} \partial_t r + V \partial_y r &= P(1 - r) \left( 1 + \frac{r}{(1 - r)^2} \right) =: P\rho(r), \\ \partial_t a + V \partial_y a &= -2r\rho(r)P, \end{aligned} \tag{13}$$

with the boundary conditions  $a(0, t) = 1$ ,  $r(0, t) = 0$ .

Explicitly calculating the network equilibrium length. In equilibrium, system (13) takes the form:

$$Vr' = P(1 - r) \left( 1 + \frac{r}{(1 - r)^2} \right) =: P\rho(r), \tag{14}$$

$$Va' = -2r\rho(r)P. \tag{15}$$

1009

1010

1011

1012

Rewriting Eq. (15) as  $a' = -(r^2)'$  shows that:

$$a(y) = 1 - r(y)^2. \quad (16)$$

1014

1015

1016

Using the separations of variables, we can rewrite Eq. (14) and find the following equation for the equilibrium length  $L$ :

1017

1018

$$V \int_0^{r(y)} \frac{1}{P\rho(\tilde{r})} d\tilde{r} = y \implies V \int_0^1 \frac{1}{P\rho(r)} dr = L. \quad (17)$$

1019

1020

1021

1022

The final result depends on the choice of how the breakage rate  $P$  depends on the actin density  $A$  and the average amount of bound ADF/Cofilin  $C_B$ . We assume  $C_B$  to be constant and use the breakage rate in the form:

1023

1024

1025

1026

$$P = c \frac{C_B^\beta}{A^\alpha} = c \frac{C_B^\beta}{(A_0 a)^\alpha} = c \frac{C_B^\beta}{A_0^\alpha (1 - r^2)^\alpha},$$

where  $c$  is the proportionality constant. This implies that the equilibrium length is given by:

1027

1028

1029

$$L = \frac{V}{c} \frac{A_0^\alpha}{C_B^\beta} \int_0^1 \frac{(1 - r^2)^\alpha}{\rho(r)} dr.$$

1030

The integral can be evaluated exactly:

1031

1032

1033

1034

$$L = \frac{V}{c} \frac{1}{C_B^\beta} \begin{cases} \frac{A_0}{2} & \alpha = 1 \\ A_0^2 \frac{27-4\sqrt{3}\pi}{12} & \alpha = 2 \end{cases}$$

1035

1036

1037

1038

1039

1040

1041

This is the formula used to compare the simulated equilibrium length to the calculated one in the main **Figure 4D**. Note that, given  $P$ , there are no free parameters, i.e. the lengths are determined exactly. As described in the main text, we used the measured equilibrium lengths, actin densities and amounts of bound ADF/Cofilin to determine exponents  $\alpha$  and  $\beta$ , and found good agreement for  $\alpha = 2$ ,  $\beta = 1$ . This lead to main Eq. (5) and is one of the ingredients used to calculate the equilibrium length below in Sec. Equilibrium lengths of homogeneous and heterogeneous networks.

1042

## Equilibrium lengths of homogeneous and heterogeneous networks

1043

Homogeneous networks.

First, we estimate the average amount of bound ADF/Cofilin  $C_B$  in a network of a given length  $L$ . We use the estimate for the density of ADF/Cofilin in the solute in the vicinity of the network, derived in the main text (Eq. (3)),

$$C_F \approx \frac{C_0 D + W L C_B r_U}{D + A W L r_B}.$$

Substitution of this expression into the equation for bound ADF/Cofilin (Eq. (10)) yields:

$$\begin{aligned} \partial_t C_B + V \partial_y C_B &= \chi(L) r_B A C_0 - \chi(L) r_U C_B, \\ C_B(y=0) &= 0, \end{aligned}$$

where we define the depletion factor  $\chi(L)$  as:

$$\chi(L) = \frac{D}{D + r_B A_0 L W}.$$

1056  
1057  
1058  
1059  
1060  
1061  
1062  
1063  
1064  
1065  
1066  
1067  
1068  
1069  
1070  
1071  
1072  
1073  
1074  
1075  
1076  
1077  
1078  
1079  
1080  
1081  
1082  
1083  
1084  
1085  
1086  
1087  
1088  
1089  
1090

For a fixed network length  $L$ , this equation can be solved for any  $y \leq Vt$ :

$$C_B(x, y, t) = \frac{r_B A C_0}{r_U} \left( 1 - e^{-\frac{r_U \chi(L)y}{V}} \right).$$

In our case,  $r_U \approx 0.3/\text{min}$ ,  $V \approx 1.5\mu\text{m}/\text{min}$ ,  $L \approx 30\mu\text{m}$ ,  $D \approx 600\mu\text{m}^2/\text{min}$ ,  $A \approx 100\mu\text{M}$ ,  $r_B \approx 0.5/\text{min}/\mu\text{M}$ , and so  $\chi \approx 10^{-2}$ . Hence we approximate the amount of bound ADF/Cofilin by the limit  $r_U \rightarrow 0$ , yielding:

$$C_B(x, y, t) = \frac{r_B A C_0 \chi(L)y}{V}.$$

The average amount of bound ADF/Cofilin, calculated as  $\frac{1}{L} \int_0^L C_B(x, y, t) dy$ , is therefore given in Eq. (6):

$$C_B = \frac{r_B A_0 C_0 L}{2V} \chi(L). \quad (18)$$

From the network fragmentation model (see Sec. Derivation of analytical model of network fragmentation) and the data, we found that for a given amount of bound ADF/Cofilin  $C_B$ , the network length is given by:

$$L = \kappa_S V \frac{(r_B A_0)^2}{C_B}, \quad (19)$$

where  $\kappa_S = 0.0669 \text{ min}^3 \times \mu\text{M}$  is the proportionality constant found using fitting to the data. Solving Eqs. (18)-(19) for  $L$  and  $C_B$  gives the equilibrium length  $L^*$ :

$$L^* = \frac{V}{C_0 D} \left( V W \kappa_S (r_B A_0)^2 + \sqrt{[V W \kappa_S (r_B A_0)^2]^2 + 2 D^2 \kappa_S r_B A_0 C_0} \right).$$

This is the formula used for all equilibrium length predictions for **Figure 2**. Note that since the expression under the square root is always positive, the model predicts that the networks always reach an equilibrium length. Before the equilibrium length is reached, the length is simply given by  $L = V t$ , which explains the plateaus in **Figure 2B** and **Figure 2D**: According to the model, the networks had not yet reached equilibrium length at  $t = 20 \text{ min}$  and  $t = 36 \text{ min}$ .

Heterogeneous networks.

For heterogeneous networks we need to determine both equilibrium lengths  $L_1, L_2$  for two sub-networks, i.e. we need to formulate Eqs. (18) and (19) separately for each sub-network. We denote by  $A_{0,1}$  and  $A_{0,2}$  the initial actin densities at the leading edge and by  $V_1$  and  $V_2$  the sub-network growth speeds. Since the networks are competing for the same pool of diffusing ADF/Cofilin, we assume that there is a common depletion factor, which we denote by  $\chi_h(L_1, L_2)$  and model by the expression:

$$\chi_h(L_1, L_2) = \frac{D}{D + r_B W (A_{0,1} L_1 + A_{0,1} L_2)},$$

which takes into account the different densities and network lengths. Now we replace Eq. (18) by:

$$C_{B,1} = \frac{r_B A_{0,1} C_0 L_1}{2V_1} \chi_h(L_1, L_2), \quad C_{B,2} = \frac{r_B A_{0,2} C_0 L_2}{2V_2} \chi_h(L_1, L_2), \quad (20)$$

and Eq. (19) by:

$$L_1 = \kappa_S V_1 \frac{(r_B A_{0,1})^2}{C_{B,1}}, \quad L_2 = \kappa_S V_2 \frac{(r_B A_{0,2})^2}{C_{B,2}}. \quad (21)$$

1106

1107

1108

1109

1110

1111

1112

1113

1114

1115

1116

1117

1118

1119

1120

1121

1122

1123

1124

1125

1126

1127

1128

1129

1130

1131

1132

1133

1134

1135

1136

1137

1138

1139

1140

1141

1142

1143

1144

1145

All that remains is to solve the four equations (20)-(21) for  $L_1$ ,  $L_2$ ,  $C_{B,1}$  and  $C_{B,2}$ . We find the relation

$$\frac{L_1}{V_1 \sqrt{A_{0,1}}} = \frac{L_2}{V_2 \sqrt{A_{0,2}}},$$

which helps to simplify the equations. The final result can be written as:

$$L_1^* = \frac{V_1}{C_0 D} \left( V_1 W \kappa_S (r_B \tilde{A}_{12})^2 + \sqrt{[V_1 W \kappa_S (r_B \tilde{A}_{12})^2]^2 + 2D^2 \kappa_S r_B A_{0,1} C_0} \right),$$

$$L_2^* = \frac{V_2}{C_0 D} \left( V_2 W \kappa_S (r_B \tilde{A}_{21})^2 + \sqrt{[V_2 W \kappa_S (r_B \tilde{A}_{21})^2]^2 + 2D^2 \kappa_S r_B A_{0,2} C_0} \right),$$

where we have defined the terms  $\tilde{A}_{ij}$  as:

$$\tilde{A}_{ij}^2 = A_{0,i}^2 + \frac{V_j}{V_i} A_{0,j} \sqrt{A_{0,i} A_{0,j}}.$$

The expressions for the equilibrium lengths are very similar to the homogeneous network case – in fact if  $V_1 = V_2$  and  $A_{0,1} = A_{0,2}$ , they simplify to the case of one single network with width  $2W$ .

## Modeling the shape of heterogeneous networks.

### Modeling.

In this section we model the shape of a network consisting of two sub-networks having different actin densities and/or growth speeds. We start by assuming that their material properties are constant along the network. We denote by  $V_1 > V_2$  the growth speeds of sub-networks 1 and 2 respectively. As the network assembles, two sub-networks are effectively ‘glued’ together. In our simple model, we assume the sub-networks to be elastic. We model each sub-network segment by two springs, placed at a distance  $W$  (the network width) from each other (App.Fig. 2). The springs at the interface  $\Gamma$  between the sub-networks are connected and forced to have the same length (representing the ‘glued’ together condition). The differences in sub-network growth speeds lead to different resting lengths  $l_1$  and  $l_2$ , proportional to the respective speeds. To account for elastic effects, we assume that the differences in density lead to different elastic moduli  $E_1$  and  $E_2$ , and hence to different spring constants  $k_1 \propto E_1/l_1$  and  $k_2 \propto E_2/l_2$ . We call the length of the outermost and innermost spring  $L_1$  and  $L_2$  respectively; the length of the two springs at the interface therefore has to be  $(L_1 + L_2)/2$ .

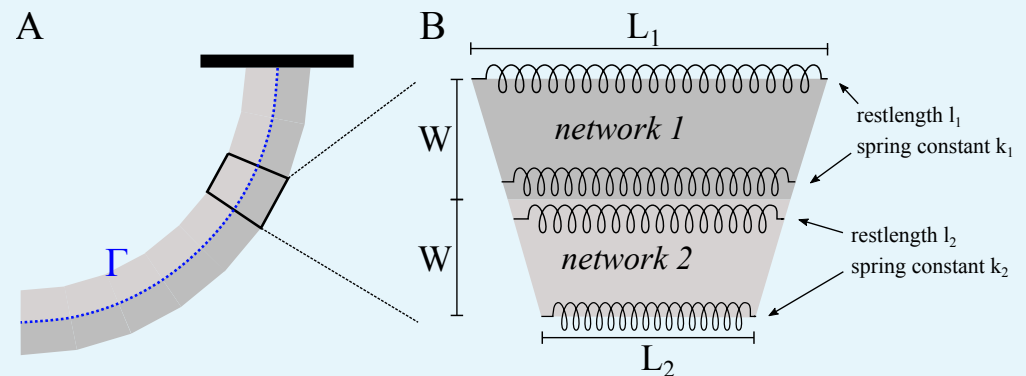

**Appendix 1 Figure 2.** Modeling of heterogeneous, elastic networks. A: Schematic of the experimental set-up. Different shading is used for the two sub-networks. The curve  $\Gamma$  represents their interface. B: Spring-based model of one network segment.



1146  
1147  
1148  
1149  
1150  
1151  
1152  
1153  
1154  
1155  
1156  
1157  
1158  
1159  
1160  
1161  
1162  
1163  
1164  
1165  
1166  
1167  
1168  
1169  
1170  
1171  
1172  
1173  
1174  
1175  
1176  
1177  
1178

## Results.

To obtain the equilibrium lengths of the sub-networks, we minimize the elastic energy of each segment, which is given by adding the potential energies for each of the four springs:

$$E_{\text{pot}} = \frac{k_1}{2} \left[ (L_1 - l_1)^2 + \left( \frac{L_1 + L_2}{2} - l_1 \right)^2 \right] + \frac{k_2}{2} \left[ (L_2 - l_2)^2 + \left( \frac{L_1 + L_2}{2} - l_2 \right)^2 \right].$$

Minimization with respect to  $L_1$  and  $L_2$  gives:

$$L_1 = l_1 + \frac{k_2(k_1 - k_2)}{\delta} (l_1 - l_2), \quad L_2 = l_2 + \frac{k_1(k_1 - k_2)}{\delta} (l_1 - l_2),$$

where  $\delta = k_1^2 + 6k_1k_2 + k_2^2$ . Using the basic proportionality theorem of elementary geometry of triangles, we find that the radius of curvature of the interface curve  $\Gamma$ , expressed as the reciprocal of the curvature  $\kappa$ , has to be:

$$\frac{1}{\kappa} = W \frac{L_1 + L_2}{L_1 - L_2} = W \left( \frac{l_1 + l_2}{l_1 - l_2} + \frac{(k_1 - k_2)(k_1 l_1 - k_2 l_2)}{4k_1 k_2 (l_1 - l_2)} \right).$$

To simplify interpretation, we denote by  $\sigma = E_2/E_1$  the ratio of the elastic moduli and we use expressions:  $l_1 = V_1 \Delta t$ ,  $l_2 = V_2 \Delta t$ , where  $\Delta t$  is the time step. This gives:

$$\frac{1}{\kappa} = W \left( \frac{V_1 + V_2}{V_1 - V_2} + (\sigma - 1) \frac{V_1 \sigma - V_2}{4\sigma(V_1 - V_2)} \right).$$

The speed of the interface is given by:

$$V_h = \frac{L_1 + L_2}{2\Delta t} = \frac{V_1 + V_2}{2} - \frac{(V_1 - V_2)(V_1^2 \sigma^2 - V_2^2)}{2(V_1^2 \sigma^2 + 6V_1 V_2 \sigma + V_2^2)}.$$

These are the formulas used to calculate the curves shown in **Figure 6B,C** in the main text. Note that:

$$\begin{aligned} \infty &\xleftarrow{\sigma \rightarrow 0} \frac{1}{\kappa} \xrightarrow{\sigma \rightarrow \infty} \infty \\ V_1 &\xleftarrow{\sigma \rightarrow 0} v_h \xrightarrow{\sigma \rightarrow \infty} V_2. \end{aligned}$$

In other words, if one of the sub-networks is much stiffer than the other one, the heterogeneous network will become straight and grow with the speed of the stiffer sub-network.

## Sub-network shapes.

Since our discussion so far concerned local properties of the sub-networks, we can account for changes in density along the combined network simply by making the elasticity ratio  $\sigma$ , and hence the curvature  $\kappa$ , a function of arc length along the network  $s$ . Then, curve  $\Gamma(s)$  at the interface of the two sub-networks can be parametrized as  $s \mapsto \Gamma(s) = (\Gamma_1(s), \Gamma_2(s))$  (App.Fig. 2), where:

$$\Gamma_1(s) = \int_0^y \sin \left( \int_0^z \kappa(w) dw \right) dz, \quad \Gamma_2(s) = \int_0^y \cos \left( \int_0^z \kappa(w) dw \right) dz.$$

In case of constant material properties along each sub-network (as shown in **Figure 6A** in the main text), these expressions simplify to:

$$\Gamma_1(s) = \frac{1 - \cos(\kappa s)}{\kappa}, \quad \Gamma_2(s) = \frac{\sin(\kappa s)}{\kappa}.$$

If actin densities vary along the sub-network, we can use the analytical approximation of the discrete model for network fragmentation described in Sec. Derivation of analytical model of network fragmentation. In particular, we have to solve Eq. (14) to obtain the density of

1191

1192

1193

1194

1195

1196

1197

1198

1199

1200

1201

1202

1203

1204

1205

1206

1207

1208

1209

1210

broken nodes, after which we can use Eq. (16) to obtain a formula for the actin density along the sub-network. To simplify the results, we use the following approximation of Eq. (14):

$$Vr' = c \frac{C_B}{A_0^2} \frac{1}{(1-r)^2}. \quad (22)$$

Using the notation introduced above in Sec. Equilibrium lengths of homogeneous and heterogeneous networks and the calculated equilibrium lengths  $L_1^*$  and  $L_2^*$ , we obtain:

$$r_1(s) = 1 - (1 - s/L_1^*)^{1/3}, \quad A_1(s) = A_{0,1}(1 - r_1^2(s)), \quad s < L_1^*$$

$$r_2(s) = 1 - (1 - s/L_2^*)^{1/3}, \quad A_2(s) = A_{0,2}(1 - r_2^2(s)), \quad s < L_2^*.$$

Since  $L_1^* > L_2^*$ , we can approximate the elasticity ratio of the two sub-networks as:

$$\sigma(s) = \begin{cases} \left( \frac{A_2(s)}{A_1(s)} \right)^{2.5} & y \in [0, L_2^*], \\ \infty & \text{elsewhere.} \end{cases} \quad (23)$$

These are the formulas used to calculate the network shapes shown in **Figure 6E** in the main text. Note that in the figure, networks have been rotated to match the experimental set-up.

| Variables & Parameters |                                  |                           |                                                    |
|------------------------|----------------------------------|---------------------------|----------------------------------------------------|
| Name                   | Meaning                          | Value                     | Comment                                            |
| $C_F$                  | diffusing ADF/Cofilin            | in $\mu M$                | simulated                                          |
| $C_B$                  | bound ADF/Cofilin                | in $\mu M$                | simulated                                          |
| $V$                    | network growth speed             | $\approx 1 - 2 \mu m/min$ | measured                                           |
| $D$                    | ADF/Cofilin diffusion constant   | $600 \mu m^2/min$         | from <i>Tania et al. (2013)</i>                    |
| $r_B$                  | ADF/Cofilin binding rate         | $0.5/min/\mu M$           | from <i>Reymann et al. (2011)</i>                  |
| $r_U$                  | ADF/Cofilin unbinding rate       | $0.31/min$                | from <i>Reymann et al. (2011)</i>                  |
| $A$                    | actin density                    | $25 - 400 \mu M$          | estimated in <i>Boujema-Paterski et al. (2017)</i> |
| $C_0$                  | ADF/Cofilin solute concentration | $125 - 500 nM$            | experimental set-up                                |
| $W$                    | network width                    | $15 - 90 \mu m$           | experimental set-up                                |
| $B$                    | domain length                    | $1 \text{ mm}$            | reflects experimental set-up                       |
| $\Delta t$             | time step for transport operator | $1.5 \text{ min}$         |                                                    |

**Appendix 1 Table 1.** Simulation parameters of ADF/Cofilin binding/unbinding model.

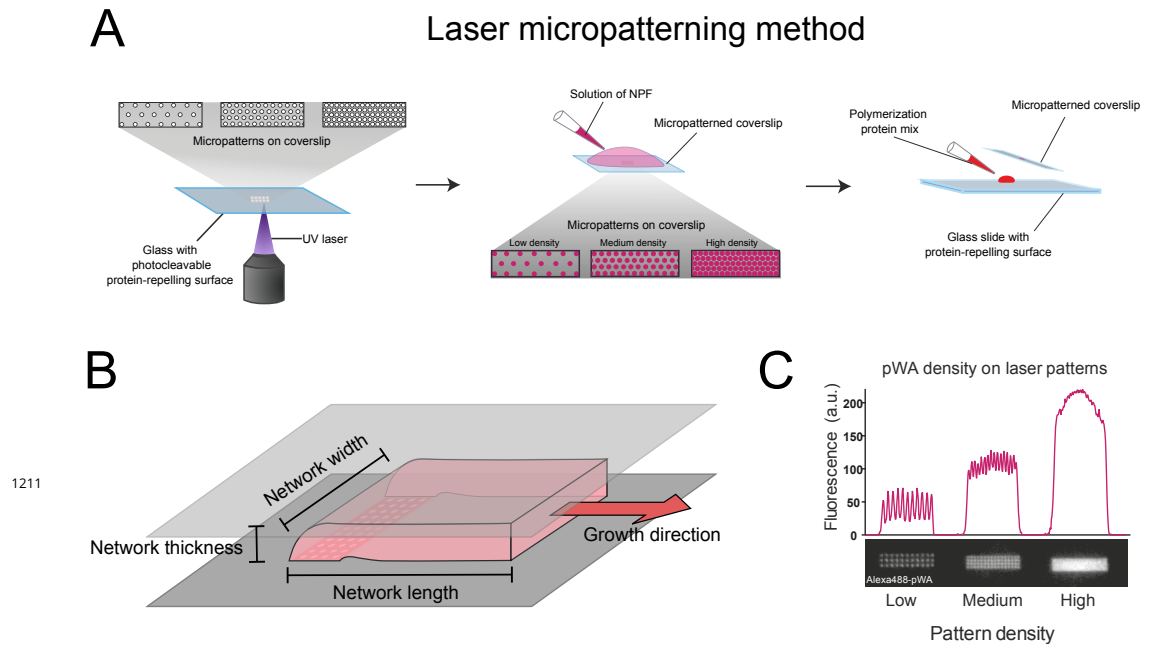

**Figure 1-Figure supplement 1.** A. Laser patterning method to locally control the density of proteins on a surface. Adhesive patterns made of arrays of spots of different density generated by a 355 nm pulse Laser (left) were coated with 500 or 1000 nM of NPFs (middle) before addition of a polymerization mix made of 6  $\mu$ M actin monomers, 18  $\mu$ M Profilin, 120 nM Arp2/3 complex and 20 nM capping proteins (see also *Boujemaa-Paterski et al. (2017)*). B. Geometry of the growing reconstituted actin networks. The growing network is shown in red, the bottom and top of the experimental chamber in grey. C. Relationship between pattern and protein densities. The density of NPFs on the pattern measured by the fluorescence of the alexa488-labeled pWA increases with the density of the spots on the patterned surface (*Boujemaa-Paterski et al., 2017*).
